# Supplementary material for: Suppressor mutations in Mecp2-null mice implicate the DNA damage response in Rett syndrome pathology
Source: PubMed Central journal article supplement (PMC7197480; doi:10.1101/gr.258400.119), 2020-04
Supplement: supp_gr.258400.119_Supplemental_Material.pdf [file supp_gr.258400.119_Supplemental_Material.pdf]

**Table of Contents for Supplemental Material**

Supplemental Table\_S1 is provided as an .xlsx file.

Supplemental\_Table\_S2 is provided as an .xlsx file.

| <u>File</u>                                                                                                                                                       | <u>Page</u> |
|-------------------------------------------------------------------------------------------------------------------------------------------------------------------|-------------|
| Supplemental_Methods.pdf                                                                                                                                          | 2           |
| Supplemental_Code.pdf                                                                                                                                             | 3-5         |
| Supplemental_Table_S3.pdf: Association test p-values                                                                                                              | 6           |
| Supplemental_Table_S4.pdf: Primer sequences for Sanger sequencing                                                                                                 | 7-8         |
| Supplemental_Table_S5.pdf: Primer sequences for qRT-PCR                                                                                                           | 9           |
| Supplemental_Fig_S1.pdf: Lesions in <i>Tet1</i> and <i>Birc6</i> fall into conserved protein domains                                                              | 10          |
| Supplemental_Fig_S2.pdf: Lesions in <i>Mre11a</i> , <i>Brca1</i> , <i>Rad50</i> , <i>Brca2</i> , <i>Fan1</i> and <i>Spin1</i> fall into conserved protein domains | 11          |
| Supplemental_Fig_S3.pdf: Sanger sequence traces                                                                                                                   | 12-17       |

## Supplemental methods

Mouse DNA: To obtain DNA, mouse tails were digested overnight at 55°C in tissue lysis buffer containing proteinase K, followed by purification with phenol chloroform, and precipitation with isopropanol. Resuspended DNA pellets were quantified using both a Nanodrop (Thermo Fisher) and Qubit (Thermo Fisher).

Sequence analysis: Genomic libraries were amplified by PCR using 10 cycles and 750 ng of the PCR-enriched library was hybridized with biotinylated probes that target exonic regions; the captured exome libraries were amplified by an additional 10 cycles of PCR. Exomic libraries were validated on a Bioanalyzer 2100 DNA High Sensitivity chip (Agilent Technologies) for size and by qPCR using the Kapa Library Quantification Illumina/ABI Prism Kit protocol (KAPA Biosystems) for quantities.

Sequence reads were mapped to the mm10 reference genome with *bwa*, and variants were called with *samtools* requiring a minimum SNP quality of 20 and a read depth  $\geq 5$ . Putative Insertion-Deletion (InDel) calls were realigned and SNP quality was recalibrated with GATK. Custom scripts combined these programs to annotate variants with respect to their predicted impact on protein sequence (Supplemental\_Code).

**Supplemental\_Code.pdf**

Custom scripts for calling detrimental variants:

```

==== project <Suppressor mutations screening in Mecp2-null mice>====
==== operating system and method <Linux clust and Linux commands see below>====
==== copyright 2020 Rong Zeng (rong.zeng@uhn.ca)====

### include <mouse reference genome:GRCm38 or mm10>

### include <69 Mouse lines:
520,654,751,4799,918_15L,J_57L,A_27R,A_333N,M_199LL,M_333R,136,137,591,722,933_15N,A_8
7N,A_120N,A_134L,A_83L,620,A_189N,A_173N,M_420L,M_79N,920_39R,S_165N,4633,J_136N,J_
157N,A_230RR,604,A_347N,272,747,752,4604,4730,904_16LL,905_20N,920_36LL,929_11R,934-
2N,J_21N,A_252LL,A_315N,A_322N,A_345L,A_210N,F_227N,F_245L,F_251L,J_3N,J_92N,J_129L,
M_351LL,M_453N,M_466LL,S_23RR,S_36R,S_158R,S_239L,S_301N,S_305L,U_45N,U_372R,U_67
2N,U_734LL,F_99N,F_311L>

### include Wellcome Trust Sanger Institute mouse SNP database <Newsnp.vcf>

### include <NGS tools: Fastx_toolkits,Fastqc,Trimmomatic,BWA,SAMtools,Picard,GATK,Annovar>

### include <script.js> adapted from the script by Pierre Lindenbaum at "L'Insitut du Thorax"

// function accept(ctx)

{
var y,g2;
var sampleList=header.getSampleNamesInOrder());

var g1=ctx.getGenotype("LINE");
/** ignore non-called */
if(g1== null || ! g1.isCalled() ) return false;
/** loop over the other samples */
for(y=0;y< sampleList.size();++y)
{
g2=ctx.getGenotype( sampleList.get(y) );

if(g2.getSampleName().equals(g1.getSampleName())) continue;
/** ignore non-called */
if(! g2.isCalled() ) continue;

/** is g1==g2 ? */
if( g1.sameGenotype( g2 ) ) return false;
}
/* found no other same genotype */
return true;
}
accept(variant);

```

====LINUX commonands for next generation sequencing data analysis, variant calling and filtering in ENU Mecp2/y mice project====

# reads alignmnet <Forward reads>

bwa aln genome.fa ./LINE/LINE\_R1.fastq.gz > LINE\_R1.sai &

# reads alignmnet <Reverse reads>

bwa aln genome.fa ./LINE/LINE\_R2.fastq.gz > LINE\_R2.sai &

# SAM format <paired-end reads>

bwa sampe -f LINE.sam -r "@RG\tID:LINE\tLB:LINE\tSM:LINE\tPL:ILLUMINA" genome.fa  
LINE\_R1.sai LINE\_R2.sai ./LINE/LINE\_R1.fastq.gz ./LINE/LINE\_R2.fastq.gz &

# sort the SAM file and convert to BAM file

java -jar SortSam.jar SO=coordinate INPUT=LINE.sam OUTPUT=LINE.bam  
VALIDATION\_STRINGENCY=LENIENT CREATE\_INDEX=true &

# Check the head of LINE.bam

samtools view -H LINE.bam

# flag possible PCR duplicates

java -Xmx25G -jar MarkDuplicates.jar INPUT=LINE.bam OUTPUT=LINE.marked.bam  
METRICS\_FILE=metrics CREATE\_INDEX=true VALIDATION\_STRINGENCY=LENIENT &

# creates a table of possible indels

java -jar GenomeAnalysisTK.jar -T RealignerTargetCreator -R genome.fa -o LINE.marked.bam.list -I  
LINE.marked.bam &

# realigns reads around possible indels

java -jar GenomeAnalysisTK.jar -I LINE.marked.bam -R genome.fa -T IndelRealigner -targetIntervals  
LINE.marked.bam.list -o LINE.marked.realigned.bam &

# fixing the mate information

java -jar FixMateInformation.jar INPUT=LINE.marked.realigned.bam OUTPUT=LINE.fixed.bam  
SO=coordinate VALIDATION\_STRINGENCY=LENIENT CREATE\_INDEX=true &

# base quality Recalibration

java -jar GenomeAnalysisTK.jar -T BaseRecalibrator -I LINE.fixed.bam -R genome.fa -knownSites  
SNPMOUSENEW.vcf -o recalibration\_reportLINE.grp &

# printReads

java -jar GenomeAnalysisTK.jar -T PrintReads -R genome.fa -I LINE.fixed.bam -BQSR  
recalibration\_reportLINE.grp -o outputLINE.bam &

# Unified Genotypes from all lines < outputLINEs.bam has included outputline.bams from all founder  
mouse lines in the study>

java -jar GenomeAnalysisTK.jar -glm BOTH -R genome.fa -T UnifiedGenotyper -I outputLINEs.bam --  
dbnp SNPMOUSENEW.vcf -o thirtyonesnp.vcf -metrics snps.metrics -stand\_call\_conf 50.0 -  
stand\_emit\_conf 10.0 -dcov 200 -A AlleleBalance &

```
# change specific LINE name in the script.js and filter variants of specific line comparing with all lines
java -Xmx50g -jar jvarkit/2014.10.15/dist/vcffilterjs.jar -f script.js ALLLINEsnp.vcf > LINE.vcf&
```

```
# splitting the genotypes of specific lines
java -Xmx25g -jar GenomeAnalysisTK.jar -R genome.fa -T SelectVariants --variant LINE.vcf -o
LINE.vcf -sn LINE &
```

```
# filter variants of specific line comparing with variants in the
java -Xmx25g -jar GenomeAnalysisTK.jar -R genome.fa -T SelectVariants --variant LINE.vcf --
discordance Newsnp.vcf -o LINEv.vcf &
```

```
# extract heterozygotes
java -Xmx4g -jar GenomeAnalysisTK.jar -T SelectVariants -R genome.fa --variant LINEv.vcf -select
'vc.getGenotype("LINE").isHet()' -o LINEhet.vcf &
```

```
# hard-Filtering
java -Xmx4g -jar GenomeAnalysisTK.jar -R genome.fa -T VariantFiltration -o LINEf.vcf --variant
LINEh.vcf --clusterWindowSize 10 --filterExpression "MQ0 >= 4 && ((MQ0 / (1.0 * DP)) > 0.1)" --
filterName "HARD_TO_VALIDATE" --filterExpression "DP < 5 " --filterName "LowCoverage" --
filterExpression "QUAL < 30.0 " --filterName "VeryLowQual" --filterExpression "QUAL > 30.0 && QUAL
< 50.0 " --filterName "LowQual" --filterExpression "QD < 1.5 " --filterName "LowQD" &
```

```
# convert the VCF file to the annovar file format:
annovar/convert2annovar.pl --format vcf4old --includeinfo LINEf.vcf > LINEt.annovar &
```

```
# annotate variant
annovar/annotate_variation.pl --buildver mm10 LINEt.annovar mm10db/ &
```

```
# convert annotated file to .txt file <exonic_region>
annovar/table_annovar.pl -otherinfo -buildver mm10 LINEt.annovar.exonic_variant_function mm10db/
-protocol refGene -operation g -nastring NA &
```

```
# convert annotated file to .txt file <exonic_intronic boundary region>
annovar/table_annovar.pl -otherinfo -buildver mm10 LINEt.annovar.variant_function mm10db/ -
protocol refGene -operation g -nastring NA &
```

Supplemental\_Table\_S3: Association test p-values for marginal gene effects and gene-gene interactions

| Line                        | Gene                           | Longevity    | Health       | Limb Claspings | Activity     | Muscle Tone  | Weight       |
|-----------------------------|--------------------------------|--------------|--------------|----------------|--------------|--------------|--------------|
| 352                         | <i>Prdm15</i>                  | < 0.001      | -            | -              | -            | -            | -            |
| 856                         | <i>Zzz3</i>                    | < 0.001      | -            | -              | -            | -            | -            |
| 895                         | <i>Sqle</i>                    | 0.330        | -            | -              | -            | -            | -            |
|                             | <i>Rbbp8</i>                   | < 0.001      | -            | -              | -            | -            | -            |
|                             | <i>Sqle</i> * <i>Rbbp8</i>     | < 0.001      | -            | -              | -            | -            | -            |
| 520                         | <i>Mark4</i>                   | 0.580        | 0.138        | 0.191          | 0.365        | 0.840        | -            |
|                             | <i>Cd22</i>                    | 0.960        | <b>0.037</b> | <b>0.015</b>   | 0.325        | 0.646        | -            |
|                             | <i>Clint1</i>                  | 0.270        | 0.498        | 0.212          | 0.663        | 0.755        | -            |
|                             | <i>Fnip1</i>                   | 0.780        | 0.970        | 0.480          | 0.766        | 0.956        | -            |
|                             | <i>Kdm4a</i>                   | <b>0.035</b> | <b>0.024</b> | <b>0.023</b>   | 0.344        | 0.866        | -            |
|                             | <i>Mark4</i> * <i>Cd22</i>     | nc           | nc           | nc             | nc           | nc           | -            |
|                             | <i>Mark4</i> * <i>Clint1</i>   | 0.129        | 0.714        | 0.419          | 0.048        | 0.116        | -            |
|                             | <i>Mark4</i> * <i>Fnip1</i>    | 0.900        | 0.572        | 0.180          | 0.453        | 0.396        | -            |
|                             | <i>Mark4</i> * <i>Kdm4a</i>    | 0.338        | 0.040        | 0.200          | 0.219        | 0.413        | -            |
|                             | <i>Cd22</i> * <i>Clint1</i>    | <b>0.042</b> | 0.344        | 0.694          | <b>0.048</b> | <b>0.031</b> | -            |
|                             | <i>Cd22</i> * <i>Fnip1</i>     | 0.830        | 0.383        | 0.725          | 0.295        | 0.140        | -            |
|                             | <i>Cd22</i> * <i>Kdm4a</i>     | 0.448        | 0.313        | 0.593          | 0.985        | 0.658        | -            |
|                             | <i>Clint1</i> * <i>Fnip1</i>   | 0.328        | 0.434        | nc             | 0.902        | 0.652        | -            |
|                             | <i>Clint1</i> * <i>Kdm4a</i>   | 0.090        | 0.471        | 0.754          | 0.057        | 0.134        | -            |
| <i>Fnip1</i> * <i>Kdm4a</i> | 0.310                          | 0.193        | 0.927        | 0.076          | 0.066        | -            |              |
| 4654                        | <i>Gtf3c5</i>                  | <b>0.030</b> | 0.974        | 0.055          | <b>0.010</b> | <b>0.014</b> | 0.460        |
|                             | <i>Dennd4a</i>                 | 0.170        | 0.549        | 0.273          | 0.132        | 0.326        | 0.313        |
|                             | <i>Tm7sf2</i>                  | 0.096        | 0.267        | <0.001         | <0.001       | <0.001       | 0.251        |
|                             | <i>Gtf3c5</i> * <i>Dennd4a</i> | 0.492        | 0.105        | 0.535          | 0.109        | 0.858        | 0.351        |
|                             | <i>Gtf3c5</i> * <i>Tm7sf2</i>  | 0.065        | 0.742        | 0.844          | 0.189        | 0.110        | 0.338        |
|                             | <i>Dennd4a</i> * <i>Tm7sf2</i> | <b>0.030</b> | 0.086        | 0.298          | 0.205        | 0.472        | 0.822        |
| 4751                        | <i>Paox</i>                    | 0.240        | 0.495        | 0.222          | 0.134        | 0.199        | -            |
|                             | <i>Argef15</i>                 | <0.001       | 0.840        | 0.263          | <0.001       | <0.001       | -            |
|                             | <i>Spin1</i>                   | <b>0.018</b> | 0.322        | <b>0.004</b>   | 0.321        | 0.079        | -            |
|                             | <i>Paox</i> * <i>Argef15</i>   | 0.133        | 0.525        | 0.993          | 0.786        | 0.516        | -            |
|                             | <i>Paox</i> * <i>Spin1</i>     | 0.921        | 0.058        | 0.807          | 0.669        | 0.948        | -            |
|                             | <i>Argef15</i> * <i>Spin1</i>  | 0.909        | 0.415        | 0.123          | 0.278        | 0.100        | -            |
| 4799                        | <i>Atp8a1</i>                  | 0.170        | <b>0.004</b> | <b>0.003</b>   | <b>0.007</b> | <b>0.005</b> | 0.552        |
|                             | <i>Aacs</i>                    | <b>0.011</b> | < 0.001      | < 0.001        | nc           | nc           | 0.556        |
|                             | <i>Atp8a1</i> * <i>Aacs</i>    | <b>0.025</b> | <b>0.006</b> | 0.191          | nc           | nc           | 0.104        |
| 918_15L                     | <i>Celsr3</i>                  | <b>0.002</b> | <b>0.002</b> | < 0.001        | nc           | nc           | 0.332        |
| J_57L                       | <i>Col24a1</i>                 | 0.990        | 0.234        | 0.135          | 0.655        | 0.960        | 0.424        |
|                             | <i>Apoa5</i>                   | 0.059        | 0.769        | <b>0.001</b>   | <b>0.019</b> | <b>0.002</b> | 0.061        |
|                             | <i>Hcn2</i>                    | <b>0.022</b> | 0.276        | 0.959          | < 0.001      | < 0.001      | <b>0.041</b> |
|                             | <i>Col24a1</i> * <i>Apoa5</i>  | 0.190        | 0.706        | 0.622          | 0.703        | 0.202        | 0.007        |
|                             | <i>Col24a1</i> * <i>Hcn2</i>   | 0.180        | 0.392        | 0.117          | 0.779        | 0.736        | 0.583        |
|                             | <i>Apoa5</i> * <i>Hcn2</i>     | 0.555        | 0.433        | 0.149          | 0.058        | <b>0.043</b> | 0.169        |
| A_27R                       | <i>Tet1</i>                    | < 0.001      | 0.460        | < 0.001        | < 0.001      | < 0.001      | -            |
|                             | <i>Pelo</i>                    | 0.950        | 0.337        | 0.132          | 0.691        | 0.968        | -            |
|                             | <i>Tet1</i> * <i>Pelo</i>      | 0.394        | 0.553        | 0.735          | 0.764        | 0.668        | -            |
| A_333N                      | <i>Shank1</i>                  | 0.071        | <b>0.035</b> | < 0.001        | -            | -            | -            |
|                             | <i>Fan1</i>                    | <b>0.004</b> | <b>0.011</b> | < 0.001        | -            | -            | -            |
|                             | <i>Shank1</i> * <i>Fan1</i>    | 0.782        | 0.730        | nc             | -            | -            | -            |
| M_199LL                     | <i>Birc6</i>                   | 0.320        | < 0.001      | -              | -            | -            | < 0.001      |
|                             | <i>Dbnl</i>                    | 0.082        | 0.662        | -              | -            | -            | 0.928        |
|                             | <i>Birc6</i> * <i>Dbnl</i>     | < 0.001      | 0.709        | -              | -            | -            | 0.675        |
| M_333R                      | <i>Zbtb41</i>                  | <b>0.017</b> | 0.887        | -              | 0.117        | 0.114        | -            |
|                             | <i>Mtor</i>                    | 0.430        | 0.340        | -              | 0.644        | 0.433        | -            |
|                             | <i>Zbtb41</i> * <i>Mtor</i>    | 0.939        | 0.106        | -              | 0.861        | 0.728        | -            |

nc: model failed to converge; - : phenotype not tested for association; The significant associations identified at the 5% significance level are in BOLD.

## Supplemental\_Table\_S4: Primers used for Sanger Sequencing

| Line (Gene)               | Forward Primer (5' to 3') | 5' to 3' Reverse Primer    |
|---------------------------|---------------------------|----------------------------|
| 352 ( <i>Prdm15</i> )     | GGACAGGGCAAATTAAGCAA      | CTCCTTCGACCACCATCAGT       |
| 856 ( <i>Zzz3</i> )       | GCCAGAGCTGTCCTCTATCCT     | TGCTGACTGGCACTCTCT         |
| 895 ( <i>Sqle</i> )       | CTTGTATAAGGAGGTGCTTAATGGA | GAAATCCACCTGCCTCTGC        |
| 895 ( <i>Rbbp8</i> )      | CATTCTCTCTTGACAAGGTGACAG  | TTTCTTTGTGGTGTGTCAGGCAGTTC |
| 520 ( <i>Cd22</i> )       | TGCTGGGAAAGCTCATGTGTA     | CCTCTTACCATAGGCCGCTT       |
| 520 ( <i>Kdm4a</i> )      | TTGAAAGGTAAGTGCACCCCG     | CCAAGCACACAGTAGGCACT       |
| 520 ( <i>Clint1</i> )     | TGACAAGTCAGAAAAACCTGAAGTC | CTCGCTCCGTTACAACCTTT       |
| 520 ( <i>Mark4</i> )      | CTGTGGGTGGTGGCTTTTTTG     | AAGTTCCCGTGGCTGTACC        |
| 520 ( <i>Fnip1</i> )      | ACTGCAGTGTGTAATGCACC      | ACAACAGAAAGCAGTTCCAAGG     |
| 4654 ( <i>Tm7sf2</i> )    | AAGTCAAGGCAGAGTCGCAA      | GCAGGCTGTAGGTGAATGGT       |
| 4654 ( <i>Gft3c5</i> )    | GCCAACCCCTTAGACTTCCA      | CCCATTAGTGCTGTTGCCCA       |
| 4654 ( <i>Dennd4a</i> )   | AGTGCAGCAGAGACCAAGAGA     | CTACAGAGCTGGCACTCACAC      |
| 4751 ( <i>Arhgef15</i> )  | GCACCTCCATCTTCTGGGAG      | GAGCTGGTTCTGGGGAGATG       |
| 4751 ( <i>Spin1</i> )     | AGGCCAAGCCCTCTGTCTAT      | GTTCCGAGGGACATCTAAGC       |
| 4751 ( <i>Paox</i> )      | CTCTGGAGGACCCTGAGCTA      | AAGGAGCGGTTACCGAAGC        |
| 4799 ( <i>Aacs</i> )      | ATCCGTGGATAACCAGGCAAG     | CCAGGTCTCCCCCTAGACAT       |
| 4799 ( <i>Atp8a1</i> )    | ACTTGGAGCTACAGCCATTGA     | CGAAACCACTTGTCTCCAGC       |
| 918-15L ( <i>Celsr3</i> ) | TGTCATGAACTCTCCGGTGG      | GCAGTCCACATACCATGCTG       |
| J_57L ( <i>Hcn2</i> )     | TTCCTGCAGCGCCAATTC        | CCGGTGACTCGAACTGC          |
| J_57L ( <i>Apoa5</i> )    | AATAAGGCCCTGAGCAGACT      | ATGAGTACCAGAAGCTGGGT       |
| J_57L ( <i>Col24a1</i> )  | ACAAGGGCATTGGATATCTTGA    | GGCACTTACCTTTAAGCCTTCT     |
| A_27R ( <i>Tet1</i> )     | CTGTCAGACATGGGGCATCA      | AGTCGCCAGCTAAGAGAGGT       |
| A_27R ( <i>Pelo</i> )     | GTGAACATCCCCAGGAAACG      | GGCTCCTCCCCATTCTAAAC       |
| A_333N ( <i>Fan1</i> )    | TGCCAGTGTGGCTCACATAC      | GCTAGGATGCAGGAAGCACT       |
| A_333N ( <i>Shank1</i> )  | ATGAGGTCTAACCAGGCCCA      | AGTTGGAGTGGAGAGGGCTT       |
| M_199LL ( <i>Birc6</i> )  | TGCTTGGTGAAGTGCAGTGTA     | TGCGAGGTGAGGTTGAATGT       |
| M_199LL ( <i>Dbn1</i> )   | TCACTGGGGCAAGTGGTTCT      | TCAAGGATTTACCAAGTAGCCA     |
| M_333R ( <i>Zbtb41</i> )  | TGCAATGCGAAGTTTCCGTC      | ATGAACGAGCTGCCATTTGC       |
| M_333R ( <i>Mtor</i> )    | ACTGCTGTGCTCTATGACCTG     | TCCGAGTTTCTGCCTCTGAT       |
| J_157N ( <i>Tbl1xr1</i> ) | TGCAAGCAAACCTCCAGTGC      | CCATGGGACATAAAGCACCC       |
| S_165N ( <i>NCoR1</i> )   | ATGCAGGCCTGGTAGAACAT      | AAAGCTAAAGGTCAGGTCTCTC     |
| 591 ( <i>Tet1</i> )       | GCAGCCGAGAATGAAGTCCA      | GCGGCGTAGAATTACATGGG       |
| 591 ( <i>Arhgap15</i> )   | CAGAAATGAACCGAACCCCC      | CCAGAACAGGCTGCAAAACAA      |
| 591 ( <i>Anapc5</i> )     | TGGCTGTCAGTCTTCCTTCT      | TCTTTCCCGCCCATTACCG        |
| 591 ( <i>Mmadhc</i> )     | CATTTCTCCTTTCTCCAGTTTTT   | AGTGCCAGCTGCTAGTTTTCC      |
| 591 ( <i>Hat1</i> )       | TGTGTGATACCTGTTGGTTTTGTC  | ATGGAGGAGGGTTCCAAAAGG      |
| 137 ( <i>Atp6v1b1</i> )   | CAGAGGTTCTCACGCTCCTT      | GGACTGATTTAGAGCGCCGT       |
| 137 ( <i>Grm8</i> )       | GGAGAAAGAGGGGTGCCTTG      | GGGTGGGTCTCCATTAGCAC       |
| 722 ( <i>Bscl2</i> )      | CTGGAAGCACACTCAGTGA       | CAGAGGCAGACCTAGAACCC       |
| 722 ( <i>Kif21a</i> )     | TCCACGCCATGAACAAAGAG      | CTGTTCCAAGACATCCAGCCC      |

|                          |                         |                        |
|--------------------------|-------------------------|------------------------|
| 722 ( <i>Adcy6</i> )     | GACCTGTGCCTCTGTCCTTTT   | TGATGTAGACGAAGAACACGGG |
| 722 ( <i>Map3k12</i> )   | GCAGGATGAGACAGGTACAGAG  | TTTTGTCAGTCCAGTCTCCCA  |
| 933-15N ( <i>Foxn4</i> ) | TGGAACAGGTTTCTGCCTCC    | TATATGGACATGCCCCCAGAA  |
| 933-15N ( <i>Parp1</i> ) | TCAGCCCCGGTGTCTGTAAT    | GGAAATTTGGGAGCTCACGG   |
| 933-15N ( <i>Cox16</i> ) | TGCGCTGAGTCTACAACCTC    | CCCTAGTCAGCAGTATCCGA   |
| 933-15N ( <i>Tdp1</i> )  | ACAGTGCGAATCTGTCCAAG    | GGATTGGAATCCTCACCACG   |
| A87N ( <i>Psmb2</i> )    | AGCGATTTGGGTGAAGACTGT   | GCTTTCTGCTGTTGAAGGCTG  |
| A87N ( <i>Emcl</i> )     | CTTCCCAGAGTCTGAACCCC    | CAGTTCAAGGACCTACAGGCA  |
| A87N ( <i>CD37</i> )     | TTGTGAGTCTACTCATGGCTACC | AGCCCTACCTGGGAAGATAGTA |
| A87N ( <i>Pcf11</i> )    | ACGCCTGTCTGGGATTATCAG   | CCAAAGACCAAGCCCCGAGT   |
| A87N ( <i>Cep72</i> )    | CTAGCTCAGGCCAAGCATGT    | ACTTGTCTTCCCCTTGTCCC   |
| A120N<br>(2310022B05Rik) | AGGTAAATTGAGGTCGGGGC    | ACGGGGAAAACCTGGCAAC    |
| A120N ( <i>Unc79</i> )   | TCCAATCTGTCAATTTCTGAGGC | CACCACTCTCCTGTCTCCTGA  |
| A120N ( <i>Eif2b5</i> )  | GGTCTTTCTGGTCTTAGGGCA   | GGTACTGGACTCTGGACAACCT |
| A120N ( <i>Fanca</i> )   | GAGCATGCTGGGTAAGAGACT   | TAACCGGAACGTCCGTCAC    |
| A120N ( <i>Sidt2</i> )   | TTGTCAAGGTGACCTCCAAGAA  | TTTCTCAGGCAGCACAAGGT   |
| A134L ( <i>Scn11a</i> )  | ACTTGCTGGGGAAATCCACT    | GCCAGCGTGCATACTTATCTT  |
| A134L ( <i>Gm14496</i> ) | TGGCTTCTTGTGCAGGGTTG    | TAGGCTGGACTCGAACTCAGAA |



Supplemental\_Table\_S5: Primers Used for qRT-PCR

| <b>Gene</b>     | <b>Forward Primer (5' to 3')</b> | <b>Reverse Primer (5' to 3')</b> |
|-----------------|----------------------------------|----------------------------------|
| <i>Tbp</i>      | CCTTGTACCCTTCACCAATGAC           | ACAGCCAAGATTCACGGTAGA            |
| <i>Rbbp8</i>    | AATGGTCAACAGGATCAAGTAGC          | GTAGCCGGTTAATGCCAGAAAA           |
| <i>Mre11a</i>   | CCGAGAAAGCAGACAGAGAAA            | AAAGGCTGAGGTGGAGGTCT             |
| <i>Rad50</i>    | GGTGAACAAGGACCTCGACA             | CCGCCAAAGATCACGAATAA             |
| <i>Nbn</i>      | CCCATGTGGAAGCTGCTC               | AGTTTTTCCTCCCAACAACG             |
| <i>Atr</i>      | GAATGGGTGAACAATACTGCTGG          | TTTGGTAGCATACTGGCGA              |
| <i>Cdk1</i>     | GACAGAGAGGGTCCGTCGTA             | TGGCCAGTGACTCTGTGTCT             |
| <i>Rpa2</i>     | ATGGATGTTTCGTCAGTGGGT            | AAAGGCCACCAAGCTCTTTT             |
| <i>Xrcc5</i>    | AGATTGCCAGCTTTGAGGAA             | GCTTTGATGCAGTCCATACTTTT          |
| <i>Trp53bp1</i> | TGGAGTCTTCTCATTTGGGT             | GCAGCTTCTACTGTCACTGCC            |
| <i>Prkdc</i>    | AAGGATGTATGCTGCCTTGG             | ACCACCATTCCCAAAGCTC              |

# Supplemental\_Fig\_S1.pdf

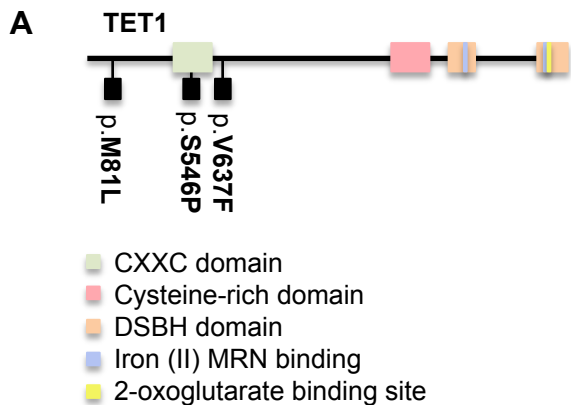

|       | <b>p.M81L</b>              | <b>p.S546P</b>                                        | <b>p.V637F</b>                    |
|-------|----------------------------|-------------------------------------------------------|-----------------------------------|
| RAT   | -TRAGAARLNQDRNQV-          | -EGGISHV <b>S</b> M <b>T</b> SSADD-                   | -EKKPK <b>V</b> LK <b>T</b> DFNN- |
| MOUSE | -TRAGAAR <b>M</b> NRDRNQV- | -EGEISRV <b>S</b> ITGSA-D-                            | -EKKPK <b>V</b> LK <b>T</b> DFNN- |
| HORSE | -TRAGAAR <b>M</b> NLDRTEV- | -EEESSQ <b>I</b> SK <b>T</b> SMVD--                   | -EKKPK <b>V</b> LK <b>A</b> DFDN- |
| COW   | -TRAGAAR <b>M</b> NLDRTEV- | -EGGSSQ <b>I</b> S <b>A</b> TRLVD--                   | -EKKPK <b>V</b> LK <b>A</b> DFDN- |
| CAT   | -TRAGAAR <b>M</b> NLDRTEV- | -EGGSSQ <b>I</b> S <b>V</b> TSMVD--                   | -EKKPK <b>V</b> LK <b>A</b> NFDN- |
| DOG   | -TRAGAAR <b>M</b> NLDRTEV- | -EGESSQ <b>V</b> S <b>M</b> T <b>S</b> VVD--          | -EKKPK <b>V</b> LK <b>A</b> DFDN- |
| HUMAN | -TRAGAAR <b>M</b> NLDRTEV- | -DRGSSQ <b>V</b> S <b>V</b> T <b>S</b> T <b>V</b> HV- | -EKKPK <b>V</b> LK <b>A</b> DFDN- |
| CHIMP | -TRAGAAR <b>M</b> NLDRTEV- | -DRGSSQ <b>V</b> S <b>V</b> T <b>S</b> T <b>V</b> HV- | -EKKPK <b>V</b> LK <b>A</b> DFEN- |

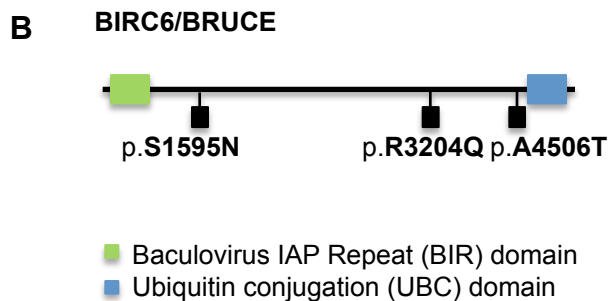

|         | <b>p.S1595N</b>                     | <b>p.R3204Q</b>              | <b>p.A4506T</b>           |
|---------|-------------------------------------|------------------------------|---------------------------|
| XENOPUS | -DDASTFTV <b>S</b> TFGVTP-          | -LQATPPH <b>R</b> RARSAAW--- | -TAEIVS <b>A</b> ATTSLRQ- |
| RAT     | -DDASTFTV <b>S</b> SFGVTP-          | -LQATPPH <b>R</b> RARSAAW--- | -TAEIVH <b>A</b> ATANLRQ- |
| MOUSE   | -DDASTFTV <b>S</b> SFGVPP-          | -LQATPPH <b>R</b> RARSAAW--- | -TAEIVH <b>A</b> ATTSLRQ- |
| HORSE   | -DDA---- <b>M</b> S <b>S</b> FGVTP- | -LQATPPH <b>R</b> RARSAAW--- | -TAEIVY <b>A</b> ATTSLRQ- |
| COW     | -DDA---- <b>M</b> S <b>S</b> FGVTP- | -LQATPPH <b>R</b> RARSAAW--- | -TAEIVY <b>A</b> ATTSLRQ- |
| CAT     | -DDASTFTV <b>S</b> SFGVTP-          | -LQATPPH <b>R</b> RARSAAW--- | -TAEIVH <b>A</b> ATTSLRQ- |
| DOG     | -DDA---- <b>M</b> S <b>S</b> FGVTP- | -LQATPPH <b>R</b> RARSAAW--- | -TAEIVH <b>A</b> ATTSLRQ- |
| HUMAN   | -DDA---- <b>M</b> S <b>S</b> FGVTP- | -LQATPPH <b>R</b> RARSAAW--- | -TAEIVY <b>A</b> ATTSLRQ- |
| CHIMP   | -DDA---- <b>M</b> S <b>S</b> FGVTP- | -LQATPPH <b>R</b> RARSAAW--- | -TAEIVY <b>A</b> ATTSLRQ- |

**Supplemental\_Fig\_S1\_Legend:** Amino acid alignments generated using Clustal Omega show that the individual amino acids as well as their surrounding sequence is well conserved among organisms. (A): Protein structure of TET1: the missense mutations cluster around the CpG binding domain. (B) Protein structure of BIRC6: The mutations occur throughout the protein, but not in known functional elements.

# Supplemental\_Fig\_S2.pdf

## A MRE11

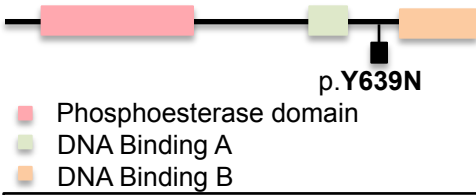

**p.Y639N**

|         |                            |
|---------|----------------------------|
| XENOPUS | -RNMPKKT <b>Y</b> SEDIEDD- |
| RAT     | -RNVATKN <b>Y</b> SETIEVD- |
| MOUSE   | -RNVAPKN <b>Y</b> SETIEVD- |
| HORSE   | -QDVATKN <b>Y</b> SEVMEVD- |
| COW     | -RNVATKN <b>Y</b> TEVIEVD- |
| CAT     | -RNVATKN <b>Y</b> TEMIEVD- |
| DOG     | -RNVATKN <b>Y</b> SEVIEVD- |
| HUMAN   | -RNVTTKN <b>Y</b> SEVIEVD- |
| CHIMP   | -RNVTTKN <b>Y</b> SEVIEVD- |

## D BRCA1

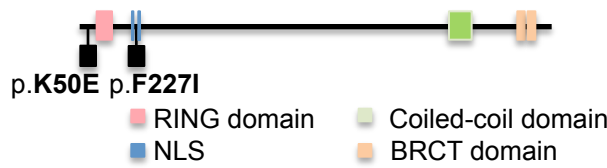

|               |                                      |                                        |
|---------------|--------------------------------------|----------------------------------------|
| <b>p.K50E</b> |                                      | <b>p.F227I</b>                         |
| XENOPUS       | -FCKFCML <b>Q</b> LLSKKKKE-          | -SD <b>Q</b> AEECFSE <b>F</b> SETAERT- |
| RAT           | -FCKFCML <b>K</b> LLN <b>Q</b> KK-G- | -AKKAACD <b>F</b> SE-GIRN-             |
| MOUSE         | -FCKFCML <b>K</b> LLN <b>Q</b> KK-G- | -AEEAACE <b>F</b> SE-GIRN-             |
| HORSE         | -FCKFCML <b>K</b> LLN <b>Q</b> KK-G- | -TKKAACE <b>F</b> SEKAITN-             |
| COW           | -FCKFCML <b>K</b> LLN <b>Q</b> KK-G- | -FFPAACE <b>F</b> SEKDITN-             |
| CAT           | -FCKFCML <b>K</b> LLN <b>Q</b> RK-G- | -AKKASCE <b>F</b> SE-DITN-             |
| DOG           | -FCKFCML <b>K</b> LLN <b>Q</b> RK-G- | -AKKAACE <b>F</b> SG-DITN-             |
| HUMAN         | -FCKFCML <b>K</b> LLN <b>Q</b> KK-G- | -AKKAACE <b>F</b> SETDVTN-             |
| CHIMP         | -FCKFCML <b>K</b> LLN <b>Q</b> KK-G- | -AKKAACE <b>F</b> SETDVTN-             |

## B RAD50

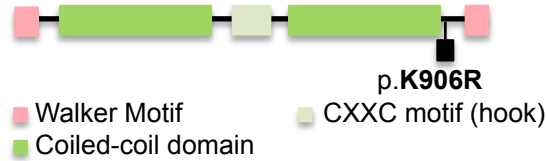

**p.K906R**

|         |                            |
|---------|----------------------------|
| XENOPUS | -QCLSREI <b>K</b> EAKEQVF- |
| RAT     | -QSLNREI <b>K</b> DAKEQIN- |
| MOUSE   | -QSLNREI <b>K</b> DAKEQIS- |
| HORSE   | -QSLYREI <b>K</b> DAKEQVS- |
| COW     | -QSLHREI <b>K</b> DAKEQLS- |
| CAT     | -QSLFREI <b>K</b> DAKEQLS- |
| DOG     | -QSLSREI <b>K</b> DAKEQLS- |
| HUMAN   | -QSLYREI <b>K</b> DAKEQVS- |
| CHIMP   | --SLYREI <b>K</b> DAKEQVS- |

## E BRCA2

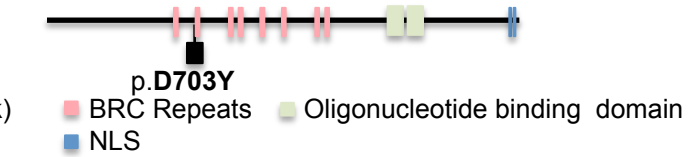

**p.D703Y**

|         |                            |
|---------|----------------------------|
| XENOPUS | -MLNS-----NVSNDM-          |
| RAT     | -PERSCEND <b>Q</b> KSPKVS- |
| MOUSE   | -PERTCEND <b>Q</b> KSPKVS- |
| HORSE   | -QEKHCED <b>D</b> SKGQRV-  |
| COW     | -QDKHCEDNPKSQGV-           |
| CAT     | -QEKHCED <b>D</b> TKSORVA- |
| DOG     | -QEKHWED <b>D</b> AKKPRVS- |
| HUMAN   | -QEGQCEN <b>D</b> PKSKKVS- |
| CHIMP   | -QEGQCEN <b>D</b> PKSKKVS- |

## C FAN1

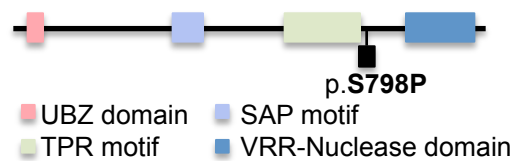

**p.S798P**

|         |                            |
|---------|----------------------------|
| XENOPUS | -PQTGMGK <b>S</b> VFIMEEL- |
| RAT     | -PQHGMGK <b>S</b> VFVIEG-  |
| MOUSE   | -PQHGMGK <b>S</b> VFVMES-  |
| HORSE   | -PQSGMGK <b>S</b> VFVMEA-  |
| COW     | -PQRGSGK <b>S</b> VFVLEA-  |
| CAT     | -PQRGMGK <b>S</b> VFVMEA-  |
| DOG     | -PQHGMGK <b>S</b> VFVMEA-  |
| HUMAN   | -PQRGMCK <b>S</b> VFVMEA-  |
| CHIMP   | -PQRGMCK <b>S</b> VFVMEA-  |

## F SPIN1

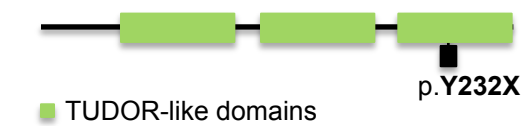

**p.Y232X**

|         |                            |
|---------|----------------------------|
| XENOPUS | -FDDDFHI <b>Y</b> VYDLVKT- |
| RAT     | -FDDDFHI <b>Y</b> VYDLVKT- |
| MOUSE   | -FDDDFHI <b>Y</b> VYDLVKT- |
| HORSE   | -FDDDFHI <b>Y</b> VYDLVKT- |
| COW     | -FDDDFHI <b>Y</b> VYDLVKT- |
| CAT     | -FDDDFHI <b>Y</b> VYDLVKT- |
| DOG     | -FDDDFHI <b>Y</b> VYDLVKT- |
| HUMAN   | -FDDDFHI <b>Y</b> VYDLVKT- |
| CHIMP   | -FDDDFHI <b>Y</b> VYDLVKT- |

**Supplemental Fig\_S2 Legend:** All amino acids as well as their surrounding sequence are highly conserved. Protein structures of (A) MRE11, (B) RAD50, (C) FAN1, (D) BRCA1, (E) BRCA2, and (F) SPIN1 with the location of the chemically-induced mutations are shown.

Supplemental\_Fig\_S3.pdf: Sanger sequence traces

*Birc6* exon49:c.9611G>A (M\_199LL)

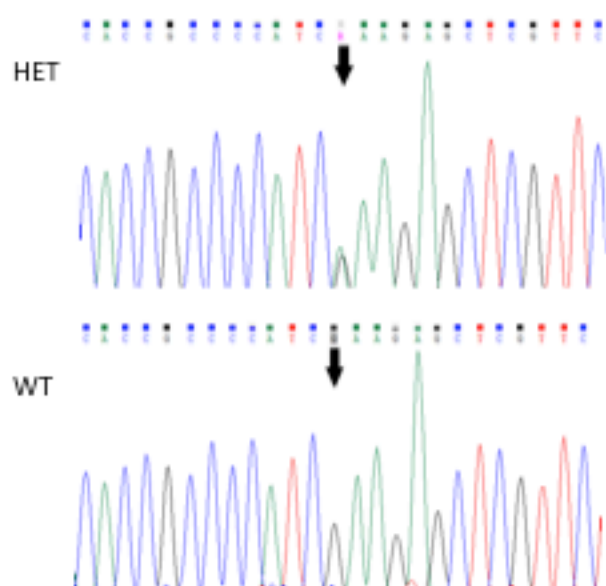

*Fan1* exon10:c.2392T>C (A\_333)

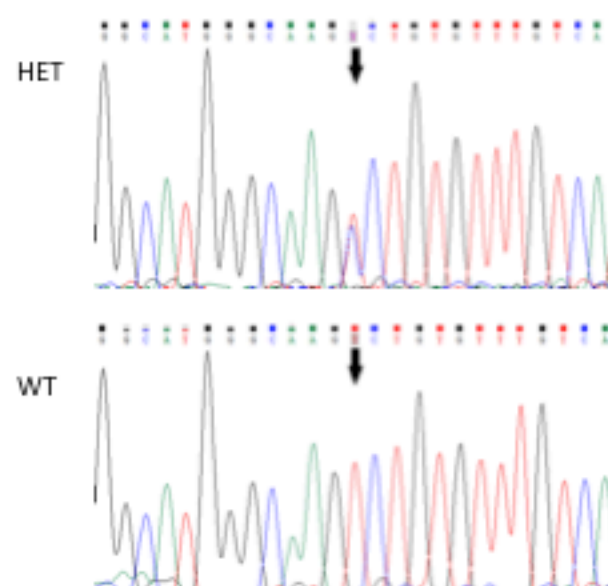

*Rbbp8* exon15:c.2227C>T (895)

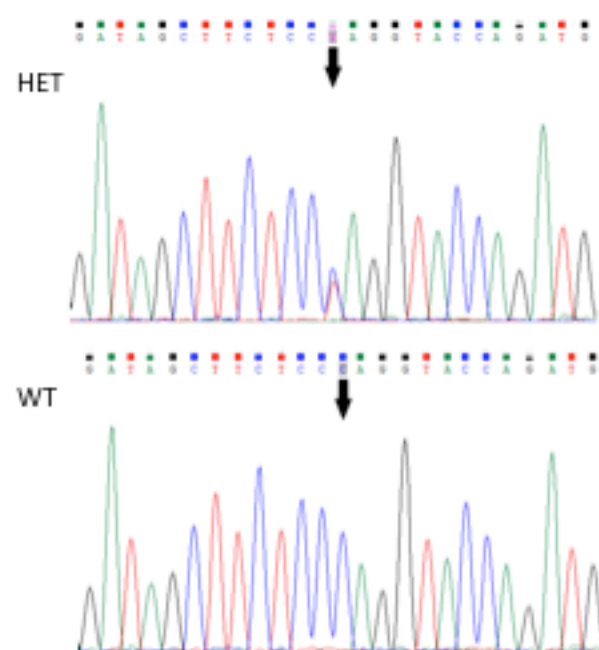

*Spin1* exon4:c.696C>A:(4751)\*

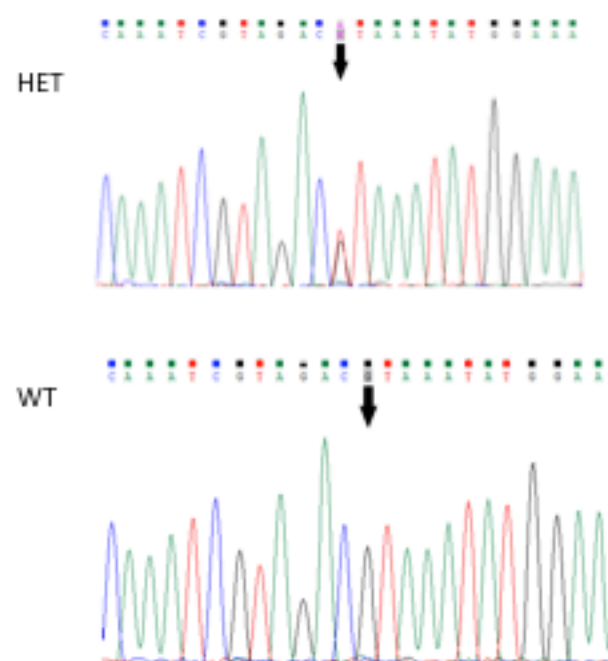

*Tet1* exon1:c.241A>T (A\_27R)

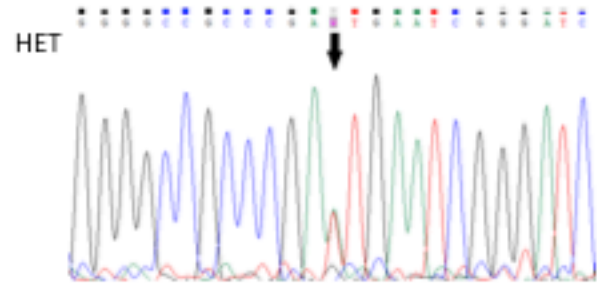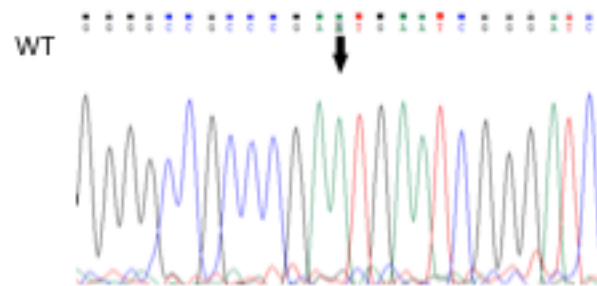

*Aacs* exon8:c.770T>C (4799)

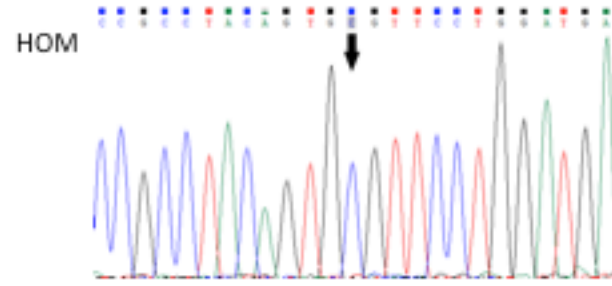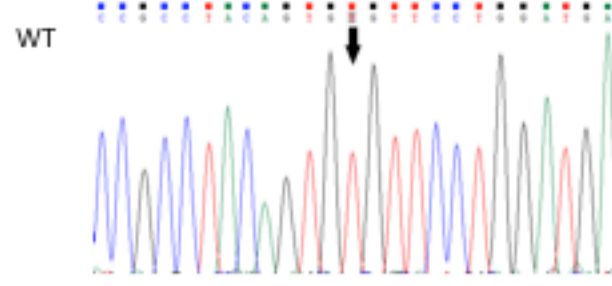

*Apoa5* exon4:c.1061A>T (J\_57L)

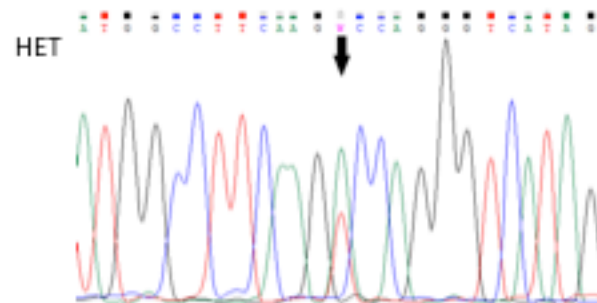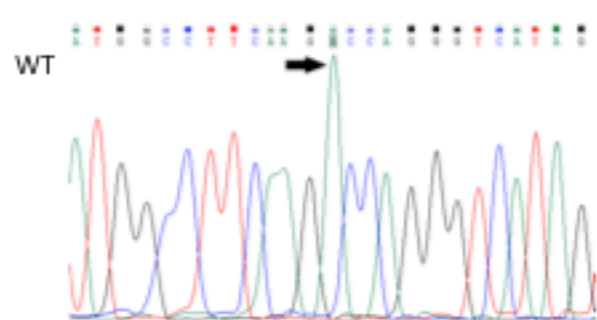

*Atp8a1* exon22:c.2037T>A (4799)

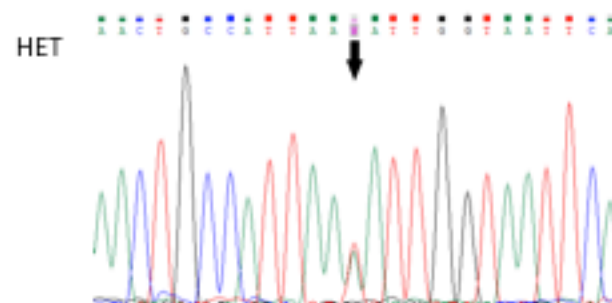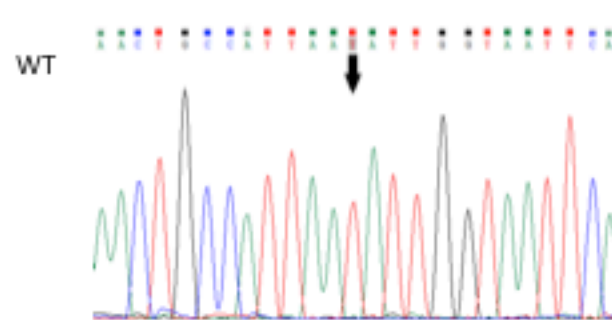

*Sqle* exon6:c.1195C>T (895)

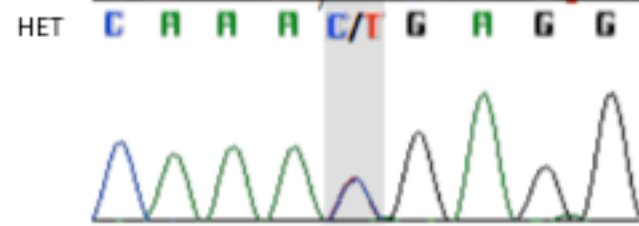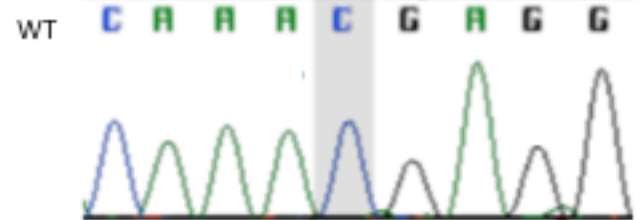

*Tm7sf2* exon6:c.697T>C (4654)

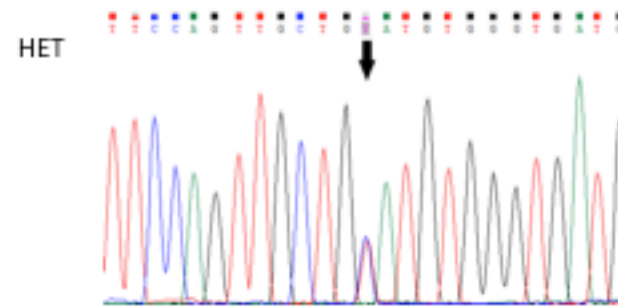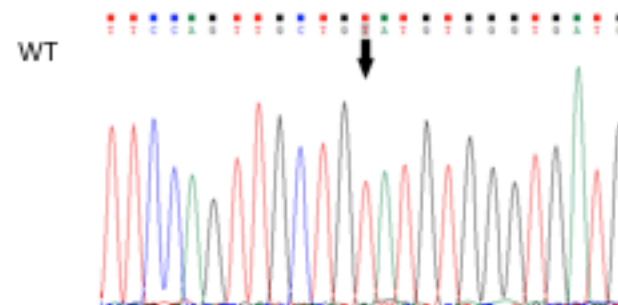

*Arhgef15* exon2:c.275A>G (4751)

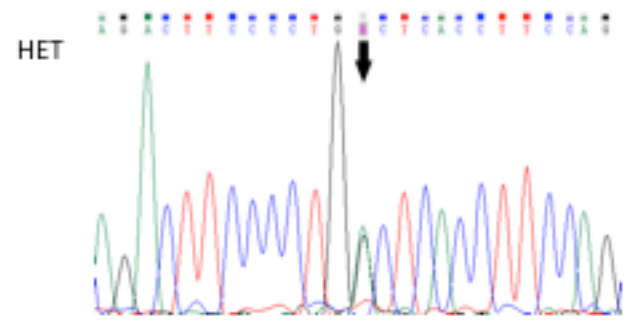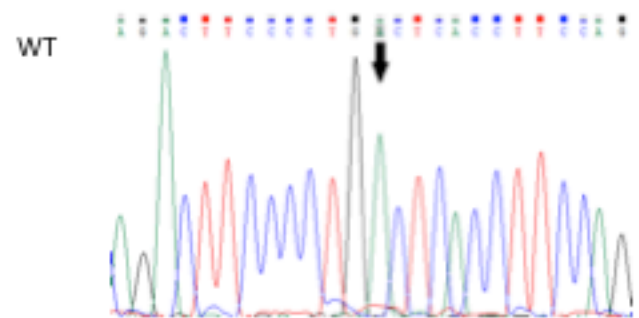

*Cd22* exon13:c.2414A>G (520)

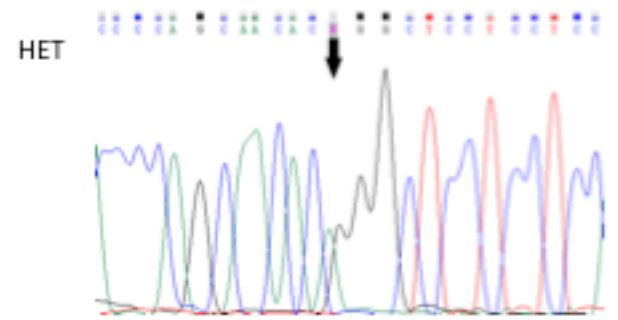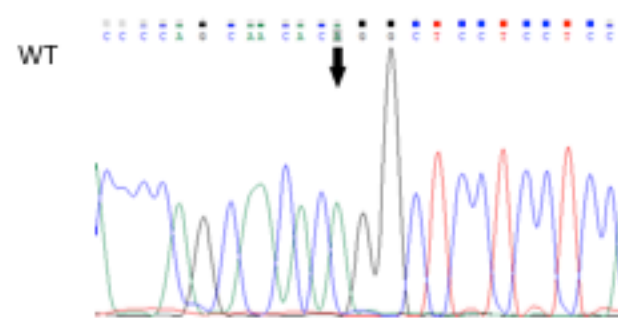

*Celsr3* exon22:c.7415T>A (918-15L)

HET

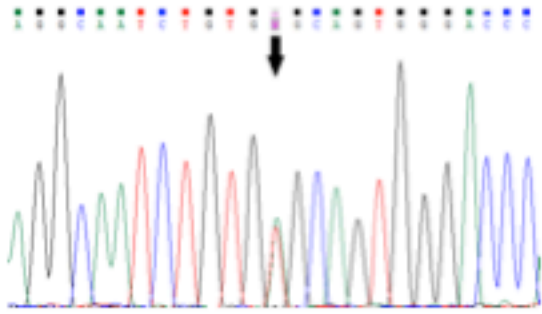

WT

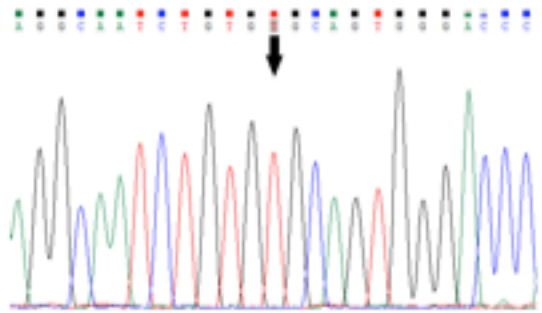

*Dbn1* exon8:c.709T>A (M\_199LL)\*

HET

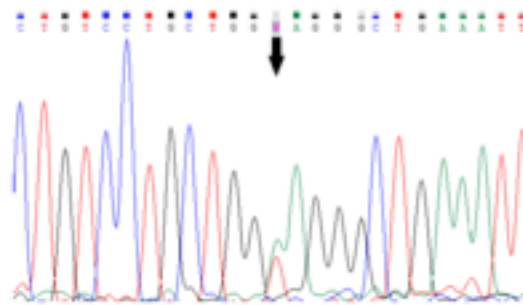

WT

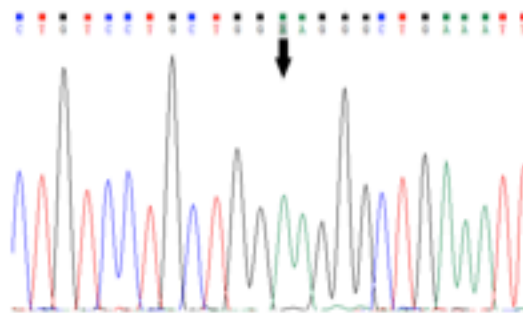

*Hcn2* exon1:c.502C>T (J\_57L)

HET

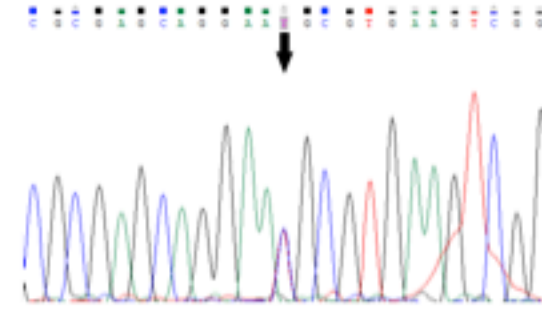

WT

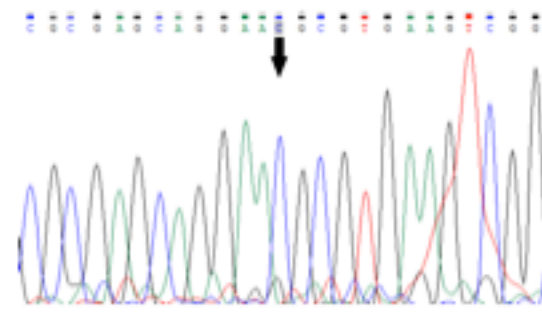

*Kdm4a* exon4:c.396T>A (520)

HET

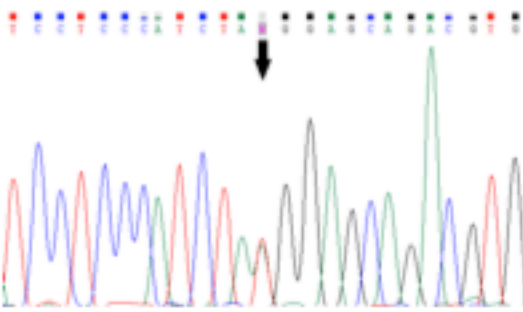

WT

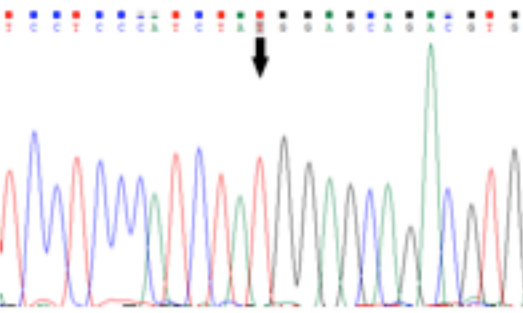







*Clint1* exon12:c.1730T>C (520)

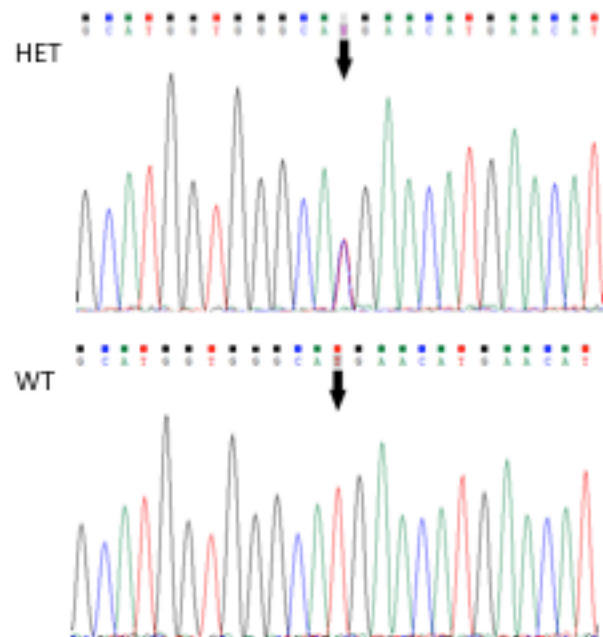

*Dennd4a* exon15:c.1778C>T (4654)

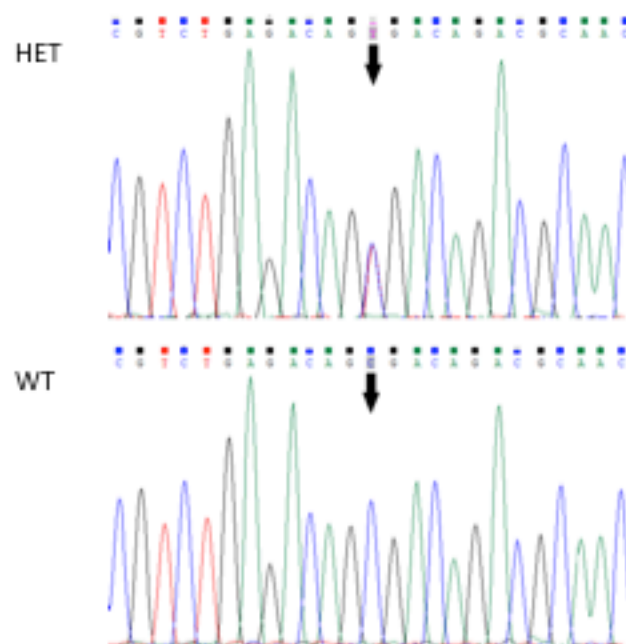

\*Reverse complement used for sequencing
