# Supplementary material for: Suppressor mutations in Mecp2-null mice implicate the DNA damage response in Rett syndrome pathology
Source: Genome Res. 2020 Apr;30(4):540–52. doi: 10.1101/gr.258400.119 (PMC7197480; doi:10.1101/gr.258400.119)
Supplement: Supplemental Material [file supp_gr.258400.119_Supplemental_Table_S1_.xlsx]

## Sheet: Summary
Mated/High confidence (13 lines, 22 genes)	Mated (10)	Allele/Pathway (15)	Nothing but lesion count (36)	Sequence analysis incomplete (32 )
352 (Prdm15)	1527	A_83L Birc6	747	U_1277LL
856 (Zzz3)	136 (Tet1)	620 (NCor1, Brca1)	752	U_1279N
895 (Sqle, Rbbp8)	137	A_189N Brca1	4604	U_1379LL
520 (CD22, Kdm4a, Clint1)	1395 (Chr 7)	A_173N Brca2	4730	D_242R
4654 (Tm7sf2 Gft3c5, Dennd4)	591 (Tet1)	M_420L Mre11a	904_16LL	D_39N
4751 (Arhgef15, Spin1)	722	M_79N Rad50	905_20N	D_45N
4799 (Aacs, Atp8a1)	933_15N	920_39R Cyp46a1	920_36LL	D_46L
918_15L (Celsr3)	A_87N	S_165N NCoR1	929_11R	D_93R
J_57L (Hcn2, Apoa5)	A_120N	4633 RCoR1	934_2N	D_99R
A_27R (Tet1)	A_134L	J_136N Zbtb41	J_21N	D_108N
A_333N (Fan1)		J_157N Tblxr1	A_252LL	D_252R
M_199LL (Birc6, Dbnl)		A_230RR Arhgef15	A_315N	D_342N
M_333R (Zbtb41 )		604 Celsr3	A_322N	R_80N
Screen 1 = gray font		A_347N Celsr3	A_345L	R_215N
Screen 2 = black font		272 Sin3a	A_210N	S_79LL
Click on the line number to navigate to lesions			F_227N	S_217N
			F_245L	S_425LL
			F_251L	S_471N
Supplemental_Table_S1 Legend: Lines in Column 1 (Mated/High Confidence) were solved based on association analysis. Candidate genes			J_3N	F_207L
associated with that line are in parentheses. Lines in Column 2 were mated and showed inheritance of traits, but were not solved			J_92N	F_213LL
based on sequencing and association analysis. Lines in Column 3 were sequenced, but have not been mated.			J_129L	F_221LL
Lines in Column 4 have either not been sequenced, or the sequence has not been analyzed.			M_351LL	U_755N
To use this Summary page to access all detrimental lesions found in that line (Columns 1, 2 and 3), simply click on the line number.			M_453N	15
Individual pages give the type of mutation (nonsynonymous, stopgain, splicing, stoploss, frameshift), the gene affected and the transcript's			M_466LL	141
National Library of Medicine RefSeq accession number (NM), along with the base and amino acid change in that transcript.			S_23RR	230
RefSeq accession numbers are not provided for lesions in multiple transcripts.			S_36R	865 (mated naturally, not inherited)
			S_158R	1373 (mated maturally, not inherited)
			S_239L	631
			S_301N	689
			S_305L	U_815N
			U_45N	U_1376N
			U_372R	U_628N
			U_672N
			U_734LL
			F_99N
			F_311L

## Sheet: 352 (screen1)
Mut Type	Gene and Mut	Chromo	Coordinate
splicing	Kcnj6	16	95200792
splicing	Itgb2l	16	96657872
splicing	Prdm15	16	96657872

## Sheet: 856 (screen1)
Mut Type	Gene and Mut	Chromo	Coordinate
nonsynonymous	zzz3	3	152091574

## Sheet: 895 (screen1)
Mut Type	Gene and Mut	Chromo	Coordinate
splicing	Itln1	chr1	173459355
nonsynonymous	Cd244	chr1	173504094
splicing	Rab3ip	chr10	116356022
nonsynonymous	Znrf3	chr11	5181285
nonsynonymous	Zfp39	chr11	58703950
nonsynonymous	Aloxe3	chr11	68962105
nonsynonymous	Hic1	chr11	74982955
nonsynonymous	Slfn9	chr11	82801199
splicing	Krt13	chr11	99981093
stopgain	Sqle	chr15	59156109
nonsynonymous	Btla	chr16	45239169
nonsynonymous	Foxn2	chr17	88862179
nonsynonymous	Ints5	chr19	8969505
nonsynonymous	March5	chr19	37295958
splicing	Ttc14	chr3	33702528
nonsynonymous	Olfr1402	chr3	97214370
nonsynonymous	Gm13088	chr4	143245377
nonsynonymous	Zfp600	chr4	146163857
splicing	Dao	chr5	114460038
splicing	Mmp17	chr5	130112413
nonsynonymous	BC055004	chr5	138690103
nonsynonymous	Tmcc1	chr6	115993646
nonsynonymous	Klra22	chr6	130330652
nonsynonymous	Vmn1r181	chr7	24769304
nonsynonymous	C030039L03Rik	chr7	28478586
nonsynonymous	Plekhf1	chr7	39006421
nonsynonymous	AF366264	chr8	13837719
nonsynonymous	Gm15284	chr8	22275102
nonsynonymous	Tubb3	chr8	125945040
nonsynonymous	Nr4a2	chr2	56961636
nonsynonymous	Neb	chr2	52160897
nonsynonymous	Gm4778	chr3	94070426
nonsynonymous	Ifna7	chr4	88462171
nonsynonymous	Pramef6	chr4	143486752
nonsynonymous	Skint6	chr4	112909102
nonsynonymous	Speer3	chr5	13796445
frameshift	Zfp446	chr7	13563296
nonsynonymous	Gm10722	chr9	3001259
nonsynonymous	H2-T3	chr17	36326702
stopgain	Rbbp8	chr18	11890791
nonsynonymous	Srfbp1	chr18	52648268

## Sheet: 1395 (screen1)
Mut Type	Gene and Mut	Chromo	Coordinate	Ref	Alt	Other
nonsynonymous	Mki67	7	142891216
nonsynonymous	Muc5b	7	149050986
nonsynonymous	Fgfr2	7	137323909
stop	Fam135a	1	24019136
nonsynonymous	Eya1	1	14173270

## Sheet: 1527 (screen1)
Mut Type	Gene and Mut	Chromo	Coordinate	Ref	Alt	Other
nonsynonymous	Efhc1:NM_027974:exon3:c.G437T:p.G146V,	chr1	20960281
splicing	Stat4(NM_011487:exon5:c.465+1G>T)	chr1
nonsynonymous	Nav1:NM_173437:exon19:c.C4142A:p.P1381H,	chr1	135454493
nonsynonymous	Prrc2b:NM_001159634:exon16:c.G3488T:p.R1163L,	chr2	32213999
nonsynonymous	Slc24a3:NM_053195:exon11:c.G893T:p.R298L,	chr2	145604566
nonsynonymous	Glrb:NM_001281969:exon10:c.C969A:p.S323R,Glrb:NM_010298:exon10:c.C1263A:p.S421R,	chr3	80845192
nonsynonymous	Fcrl5:NM_183222:exon3:c.G106T:p.V36F,	chr3	87442025
frameshift	Ivl:NM_008412:exon2:c.423_424insA:p.Q142fs,	chr3	92572333
nonsynonymous	Abca4:NM_007378:exon46:c.G6356T:p.G2119V,	chr3	122170818
nonsynonymous	Bnc2:NM_172870:exon5:c.G1892T:p.R631L,	chr4	84292239
nonsynonymous	Tmem68:NM_028097:exon8:c.G962A:p.R321H,	chr4	3550503
nonsynonymous	Zbtb17:NM_009541:exon7:c.C885G:p.I295M,	chr4	141464463
nonsynonymous	Smc2:NM_008017:exon10:c.G1119T:p.L373F,	chr4	52457360
nonsynonymous	Hivep3:NM_010657:exon4:c.G2672T:p.R891L,	chr4	120097160
nonsynonymous	Pclo:NM_001110796:exon6:c.G10077T:p.M3359I,Pclo:NM_011995:exon6:c.G10077T:p.M3359I,	chr5	14681562
nonsynonymous	Agap3:NM_139153:exon1:c.G327T:p.E109D,Agap3:NM_001256431:exon1:c.G327T:p.E109D,	chr5	24452533
nonsynonymous	Zbtb49:NM_029162:exon8:c.C1642A:p.H548N,	chr5	38201266
nonsynonymous	Ap1s1:NM_007457:exon4:c.C421A:p.L141M,	chr5	137037426
nonsynonymous	P2rx7:NM_001284402:exon13:c.C1547A:p.S516Y,P2rx7:NM_011027:exon13:c.C1556A:p.S519Y,	chr5	122681072
nonsynonymous	Fam47e:NM_001170571:exon1:c.T91C:p.S31P,Fam47e:NM_001033478:exon1:c.T91C:p.S31P,	chr5	92571679
nonsynonymous	Gm15800:NM_181421:exon40:c.G6256T:p.A2086S,	chr5	121320017
nonsynonymous	Rnf181:NM_025607:exon2:c.C184A:p.L62I,	chr6	72361481
nonsynonymous	Hoxa10:NM_008263:exon1:c.C548A:p.A183E,	chr6	52234387
nonsynonymous	Dyrk4:NM_207210:exon11:c.A1298G:p.E433G,	chr6	126885230
nonsynonymous	Ptpro:NM_001164402:exon13:c.G956T:p.G319V,Ptpro:NM_001164403:exon12:c.G872T:p.G291V,Ptpro:NM_001164401:exon23:c.G3335T:p.G1112V,Ptpro:NM_011216:exon24:c.G3419T:p.G1140V,	chr6	137450004
splicing	Plekha5(NM_144920:exon21:c.2550+1G>T)	chr6
nonsynonymous	Zfp865:NM_001033383:exon2:c.G2008T:p.G670W,	chr7	5031025
nonsynonymous	Trappc6a:NM_025960:exon4:c.G320T:p.G107V,	chr7	19515056
nonsynonymous	Dmwd:NM_010058:exon2:c.G596T:p.S199I,	chr7	19078218
nonsynonymous	Rfx1:NM_009055:exon3:c.G304T:p.A102S,	chr8	84079868
nonsynonymous	Stxbp2:NM_011503:exon19:c.C1772A:p.A591D,	chr8	3642721
nonsynonymous	Mmp2:NM_008610:exon7:c.G1160T:p.W387L,	chr8	92837059
nonsynonymous	Piwil4:NM_177905:exon12:c.A1723G:p.R575G,	chr9	14714889
nonsynonymous	Zfp266:NM_001082485:exon9:c.A551G:p.N184S,Zfp266:NM_001135019:exon9:c.A551G:p.N184S,	chr9	20500329
nonsynonymous	Ccr4:NM_009916:exon2:c.C643A:p.L215M,	chr9	114492353
nonsynonymous	Aplp2:NM_001102456:exon12:c.C1633A:p.P545T,Aplp2:NM_009691:exon12:c.C1633A:p.P545T,Aplp2:NM_001102455:exon13:c.C1801A:p.P601T,	chr9	31157731
nonsynonymous	Elp6:NM_001081381:exon5:c.G472T:p.A158S,	chr9	110315899
nonsynonymous	Dlec1:NM_177117:exon20:c.A2891G:p.Y964C,	chr9	119134510
nonsynonymous	Gjc2:NM_080454:exon2:c.G871C:p.G291R,Gjc2:NM_175452:exon2:c.G871C:p.G291R,	chr11	59176784
nonsynonymous	Pigs:NM_201406:exon6:c.C587T:p.T196M,	chr11	78335545
nonsynonymous	Fbf1:NM_172571:exon11:c.A577T:p.T193S,	chr11	116155447
splicing	Cep112	chr11	108425353
nonsynonymous	Gpr75:NM_175490:exon2:c.G1618A:p.V540I,	chr11	30892714
nonsynonymous	Fat2:NM_001029988:exon9:c.G6292T:p.D2098Y,	chr11	55283594
nonsynonymous	Serpina1e:NM_009247:exon3:c.A664G:p.K222E,	chr12	103949282
nonsynonymous	Vrtn:NM_001168589:exon2:c.C1531A:p.P511T,Vrtn:NM_001033776:exon2:c.C1531A:p.P511T,Vrtn:NM_001168588:exon3:c.C1531A:p.P511T,	chr12	84650008
nonsynonymous	Snx18:NM_130796:exon1:c.C1523A:p.P508Q,	chr13	113616873
nonsynonymous	Mcidas:NM_001037914:exon1:c.G37T:p.A13S,	chr13	112993908
nonsynonymous	Appl1:NM_145221:exon5:c.C302A:p.A101E,	chr14	26961022
stopgain	Arhgap22:NM_153800:exon10:c.C1553A:p.S518X,	chr14	33367116
nonsynonymous	Tg:NM_009375:exon41:c.G7048T:p.A2350S,	chr15	66773293
nonsynonymous	Ddx23:NM_001080981:exon12:c.G1495A:p.V499M,	chr15	98649777
nonsynonymous	Arid2:NM_175251:exon15:c.G3797T:p.R1266L,	chr15	96371804
nonsynonymous	Kalrn:NM_177357:exon40:c.C5905A:p.H1969N,	chr16	34035078
nonsynonymous	Ccr6:NM_001190334:exon4:c.T854C:p.V285A,Ccr6:NM_009835:exon6:c.T854C:p.V285A,Ccr6:NM_001190337:exon2:c.T854C:p.V285A,Ccr6:NM_001190335:exon3:c.T854C:p.V285A,Ccr6:NM_001190338:exon2:c.T977C:p.V326A,Ccr6:NM_001190333:exon3:c.T854C:p.V285A,Ccr6:NM_001190336:exon3:c.T854C:p.V285A,	chr17	8256818
nonsynonymous	Ctnna1:NM_009818:exon4:c.G410A:p.R137Q,	chr18	35174361
nonsynonymous	Acaa2:NM_177470:exon6:c.C726A:p.D242E,	chr18	74798460
nonsynonymous	Cxxc1:NM_028868:exon2:c.G50T:p.S17I,	chr18	74217213
nonsynonymous	Cyp2c44:NM_001167905:exon8:c.C1204A:p.Q402K,Cyp2c44:NM_001001446:exon8:c.C1204A:p.Q402K,	chr19	44007123
nonsynonymous	Mta2:NM_011842:exon4:c.G261T:p.E87D,	chr19	8945826
nonsynonymous	Dock8:NM_028785:exon37:c.G4654A:p.V1552M,	chr19	25174198
nonsynonymous	Psd:NM_028627:exon5:c.C1018A:p.P340T,	chr19	46323222
nonsynonymous	Slc25a43:NM_001085497:exon1:c.C259A:p.L87M,	chrX	36744002
frameshift	Zmym3:NM_001177987:exon1:c.50_51del:p.17_17del,	chrX	101420606
nonsynonymous	Irs4:NM_010572:exon1:c.C2887A:p.L963M,	chrX	141722312
nonsynonymous	Kdm5c:NM_013668:exon13:c.C1795A:p.R599S,	chrX	152261985
nonsynonymous	AU022751:NM_001166433:exon1:c.C1645A:p.P549T,AU022751:NM_001033211:exon2:c.C1282A:p.P428T,	chrX	6081678
stopgain	Slc16a2:NM_009197:exon6:c.G1594T:p.G532X,	chrX	103699791
nonsynonymous	Plxnb3:NM_019587:exon19:c.G3380T:p.G1127V,	chrX	73767074
nonsynonymous	Amot:NM_153319:exon10:c.G2263T:p.A755S,	chrX	145450752

## Sheet: 136
Mut Type	Gene and Mut	Chromo	Coordinate
nonsynonymous	Tet1:NM_001253857:exon2:c.G1909T:p.V637F,Tet1:NM_027384:exon2:c.G1909T:p.V637F,	chr10	62864816
nonsynonymous	Rhobtb1:NM_001081347:exon9:c.G1756A:p.A586T,Rhobtb1:NM_001252636:exon9:c.G1756A:p.A586T,Rhobtb1:NM_001252638:exon10:c.G1396A:p.A466T,Rhobtb1:NM_001252637:exon9:c.G1756A:p.A586T,	chr10	69285719
nonsynonymous	Tac2:NM_009312:exon4:c.A223G:p.T75A,Tac2:NM_001199971:exon5:c.A223G:p.T75A,	chr10	127728458
nonsynonymous	Fam161a:NM_028672:exon3:c.A970G:p.R324G,	chr11	23020793
nonsynonymous	Pitpnm3:NM_001081641:exon15:c.T2003A:p.V668D,Pitpnm3:NM_001024927:exon16:c.T2051A:p.V684D,	chr11	72058491
nonsynonymous	Cluh:NM_001081158:exon10:c.G1312A:p.V438I,	chr11	74661442
nonsynonymous	Lig3:NM_010716:exon20:c.A2935G:p.T979A,	chr11	82801410
nonsynonymous	Kcnh6:NM_001037712:exon5:c.A979C:p.N327H,	chr11	106017538
nonsynonymous	Dcaf7:NM_027946:exon1:c.A32G:p.Y11C,	chr11	106037155
nonsynonymous	Smarcd2:NM_031878:exon5:c.C642A:p.D214E,Smarcd2:NM_001130187:exon6:c.C783A:p.D261E,	chr11	106265924
nonsynonymous	Ywhaq:NM_011739:exon2:c.G406T:p.D136Y,	chr12	21398253
nonsynonymous	Nin:NM_001286079:exon6:c.G553A:p.E185K,Nin:NM_001081453:exon5:c.G553A:p.E185K,Nin:NM_001286080:exon7:c.G553A:p.E185K,Nin:NM_008697:exon7:c.G553A:p.E185K,	chr12	70061264
nonsynonymous	Six4:NM_011382:exon2:c.G1519A:p.A507T,	chr12	73108673
nonsynonymous	Gpatch2l:NM_027405:exon2:c.C353A:p.T118K,	chr12	86244397
nonsynonymous	Irf2bpl:NM_145836:exon1:c.G1984A:p.V662M,	chr12	86881914
nonsynonymous	Bag5:NM_027404:exon2:c.T857C:p.M286T,	chr12	111710531
nonsynonymous	Slc38a9:NM_178746:exon7:c.T595C:p.S199P,	chr13	112695312
nonsynonymous	Styx:NM_019637:exon10:c.G526A:p.A176T,	chr14	45372406
nonsynonymous	Defb43:NM_001039121:exon2:c.A83G:p.D28G,	chr14	63017802
nonsynonymous	Stc1:NM_009285:exon3:c.A386G:p.Y129C,	chr14	69032358
nonsynonymous	Pkhd1l1:NM_138674:exon52:c.A8873T:p.D2958V,	chr15	44556013
nonsynonymous	Il2rb:NM_008368:exon10:c.A1565G:p.D522G,	chr15	78481531
nonsynonymous	Scn8a:NM_001077499:exon6:c.A617T:p.Y206F,	chr15	100959342
nonsynonymous	Ropn1:NM_030744:exon5:c.T424C:p.C142R,	chr16	34677163
nonsynonymous	Supt3:NM_178652:exon8:c.T616A:p.C206S,	chr17	45036747
nonsynonymous	Soga2:NM_172963:exon5:c.A2236G:p.K746E,Soga2:NM_001114098:exon5:c.A2236G:p.K746E,	chr17	66379674
nonsynonymous	Trim36:NM_001170855:exon3:c.A382G:p.T128A,Trim36:NM_178872:exon3:c.A418G:p.T140A,	chr18	46188597
nonsynonymous	Cep192:NM_027556:exon32:c.T5665C:p.S1889P,	chr18	67858113
nonsynonymous	Kdm2a:NM_001001984:exon9:c.T701A:p.I234N,	chr19	4350317
nonsynonymous	Cdk9:NM_130860:exon6:c.C698T:p.T233I,	chr2	32709522
nonsynonymous	Neb:NM_010889:exon28:c.A2648G:p.K883R,	chr2	52296411
nonsynonymous	Ttn:NM_011652:exon61:c.T15040C:p.S5014P,	chr2	76896434
nonsynonymous	Zfp408:NM_001033451:exon4:c.A842G:p.Y281C,	chr2	91645966
nonsynonymous	Plcb1:NM_019677:exon17:c.G1759A:p.V587I,Plcb1:NM_001145830:exon17:c.G1759A:p.V587I,	chr2	135335508
nonsynonymous	Gm5535:NM_001033778:exon3:c.T185C:p.V62A,	chr2	144174619
nonsynonymous	Phf20:NM_172674:exon14:c.A2063G:p.E688G,	chr2	156296698
nonsynonymous	L3mbtl1:NM_001081338:exon7:c.C722A:p.P241Q,	chr2	162948877
nonsynonymous	Iqgap3:NM_001033484:exon5:c.T362A:p.I121N,	chr3	88088895
nonsynonymous	Mier1:NM_001286221:exon15:c.A1658G:p.N553S,Mier1:NM_001286223:exon13:c.A1520G:p.N507S,Mier1:NM_001286222:exon15:c.A1574G:p.N525S,Mier1:NM_027696:exon15:c.A1574G:p.N525S,Mier1:NM_001039081:exon13:c.A1523G:p.N508S,	chr4	103162738
nonsynonymous	Mroh7:NM_001126487:exon21:c.T3326A:p.V1109D,	chr4	106690318
nonsynonymous	Capzb:NM_009798:exon3:c.A173G:p.D58G,Capzb:NM_001037761:exon3:c.A173G:p.D58G,Capzb:NM_001271406:exon3:c.A137G:p.D46G,Capzb:NM_001271405:exon3:c.A260G:p.D87G,	chr4	139257340
nonsynonymous	Adam22:NM_001007220:exon16:c.A1340G:p.N447S,Adam22:NM_001007221:exon16:c.A1340G:p.N447S,Adam22:NM_001098225:exon16:c.A1340G:p.N447S,	chr5	8134859
nonsynonymous	Gpr125:NM_133911:exon19:c.C3574A:p.Q1192K,	chr5	49960631
nonsynonymous	Klhl5:NM_175174:exon6:c.A1121G:p.D374G,	chr5	65156065
nonsynonymous	Tmem116:NM_001161627:exon9:c.G776T:p.R259L,Tmem116:NM_029912:exon8:c.G311T:p.R104L,Tmem116:NM_001161626:exon8:c.G671T:p.R224L,	chr5	121493737
nonsynonymous	Amz1:NM_173405:exon3:c.G232C:p.E78Q,	chr5	140741515
stopgain	Cand2:NM_025958:exon9:c.T1430A:p.L477X,	chr6	115791325
nonsynonymous	Tas2r104:NM_207011:exon1:c.T712C:p.F238L,	chr6	131685033
nonsynonymous	Zfp568:NM_001167872:exon10:c.G1388A:p.S463N,Zfp568:NM_001167873:exon10:c.G1385A:p.S462N,Zfp568:NM_001033355:exon10:c.G1388A:p.S463N,	chr7	30023019
nonsynonymous	Vrk3:NM_133945:exon9:c.A749T:p.D250V,	chr7	44764830
nonsynonymous	Olfr299:NM_001011767:exon1:c.A936T:p.E312D,	chr7	86466348
nonsynonymous	Pak1:NM_011035:exon8:c.G778A:p.V260M,	chr7	97888965
nonsynonymous	Nup98:NM_022979:exon16:c.T2151A:p.D717E,	chr7	102153841
nonsynonymous	Fam160a2:NM_001242364:exon9:c.T1702A:p.Y568N,Fam160a2:NM_001242363:exon10:c.T1660A:p.Y554N,Fam160a2:NM_199009:exon9:c.T1660A:p.Y554N,	chr7	105384348
nonsynonymous	Rrp8:NM_025897:exon3:c.G709A:p.G237R,Rrp8:NM_133951:exon3:c.G847A:p.G283R,	chr7	105734211
nonsynonymous	Scaper:NM_001081341:exon10:c.T826C:p.S276P,	chr9	55874845
nonsynonymous	Entpd3:NM_178676:exon4:c.A170T:p.Y57F,	chr9	120554070

## Sheet: 137
Mut Type	Gene and Mut	Chromo	Coordinate
nonsynonymous	Mypn:NM_182992:exon20:c.T3904C:p.Y1302H,	chr10	63116901
nonsynonymous	Tbc1d9b:NM_029745:exon21:c.T3563C:p.V1188A,	chr11	50171229
nonsynonymous	Kcnab3:NM_010599:exon9:c.T653C:p.I218T,	chr11	69330767
nonsynonymous	Galc:NM_008079:exon1:c.C138A:p.D46E,	chr12	98259192
nonsynonymous	Serpina9:NM_027997:exon2:c.T608G:p.V203G,	chr12	104008285
nonsynonymous	Cenpp:NM_025495:exon7:c.T722C:p.V241A,	chr13	49464706
nonsynonymous	Kcns2:NM_181317:exon2:c.A772G:p.N258D,Kcns2:NM_001271704:exon2:c.A772G:p.N258D,	chr15	34839264
nonsynonymous	Apol11a:NM_001177533:exon4:c.A592G:p.N198D,	chr15	77516906
nonsynonymous	Ccr6:NM_001190334:exon4:c.A619G:p.M207V,Ccr6:NM_001190338:exon2:c.A742G:p.M248V,Ccr6:NM_009835:exon6:c.A619G:p.M207V,Ccr6:NM_001190336:exon3:c.A619G:p.M207V,Ccr6:NM_001190333:exon3:c.A619G:p.M207V,Ccr6:NM_001190335:exon3:c.A619G:p.M207V,Ccr6:NM_001190337:exon2:c.A619G:p.M207V,	chr17	8256583
frameshift	Vmn2r98:NM_001104550:exon6:c.1654_1655insG:p.K552fs,	chr17	19080391
nonsynonymous	Vmn2r109:NM_001104571:exon3:c.C553T:p.R185C,	chr17	20554539
nonsynonymous	Tmem180:NM_029186:exon2:c.C119T:p.T40I,	chr19	46366504
nonsynonymous	Olfr346:NM_146938:exon1:c.T349C:p.S117P,	chr2	36688352
nonsynonymous	Xirp2:NM_001024618:exon7:c.A9665G:p.E3222G,Xirp2:NM_001083919:exon7:c.A9665G:p.E3222G,	chr2	67517081
nonsynonymous	Ubr3:NM_001081548:exon36:c.T5161C:p.W1721R,Ubr3:NM_177783:exon36:c.T5152C:p.W1718R,	chr2	70018522
nonsynonymous	Efcab7:NM_145549:exon6:c.T689A:p.I230N,	chr4	99897444
nonsynonymous	Pla2g2a:NM_001082531:exon5:c.A266G:p.Y89C,	chr4	138833346
nonsynonymous	Grm8:NM_008174:exon2:c.A311G:p.D104G,	chr6	28125815
nonsynonymous	Atp6v1b1:NM_134157:exon14:c.C1485A:p.D495E,	chr6	83758436
nonsynonymous	Add2:NM_001271859:exon6:c.T503C:p.F168S,Add2:NM_001271861:exon6:c.T503C:p.F168S,Add2:NM_013458:exon6:c.T503C:p.F168S,Add2:NM_001271857:exon6:c.T503C:p.F168S,Add2:NM_001271860:exon6:c.T503C:p.F168S,Add2:NM_001271858:exon6:c.T503C:p.F168S,	chr6	86093430
nonsynonymous	Vmn1r89:NM_134226:exon1:c.A449G:p.D150G,	chr7	13219787
nonsynonymous	Slc5a11:NM_146198:exon13:c.T1223A:p.I408N,	chr7	123265695
nonsynonymous	Dlgap2:NM_001145965:exon5:c.T352C:p.S118P,Dlgap2:NM_172910:exon6:c.T349C:p.S117P,	chr8	14727108
splicing	Grin2a(NM_008170:exon6:c.1497+2T>C)	chr16	9663437
splicing	Socs6	chr18	88870920

## Sheet: 272
Mut Type	Gene and Mut	Chromo	Coordinate
nonsynonymous	Syne1:NM_001079686:exon29:c.A4691C:p.Q1564P,	chr10	5108523
nonsynonymous	Pfkl:NM_008826:exon10:c.A1033G:p.R345G,	chr10	77995273
nonsynonymous	Trappc10:NM_001081055:exon17:c.A2746T:p.M916L,	chr10	78200638
nonsynonymous	Stat6:NM_009284:exon22:c.T2344C:p.Y782H,	chr10	127659811
nonsynonymous	Mtmr3:NM_028860:exon16:c.A2966G:p.H989R,	chr11	4487487
nonsynonymous	Pank3:NM_145962:exon2:c.C158T:p.T53I,	chr11	35776215
nonsynonymous	Pmp22:NM_008885:exon5:c.A409T:p.I137F,	chr11	63158341
nonsynonymous	Psme3:NM_011192:exon5:c.T270A:p.D90E,	chr11	101319482
nonsynonymous	Fam84a:NM_029007:exon2:c.A104G:p.Y35C,	chr12	14150621
nonsynonymous	Gpr22:NM_175191:exon3:c.A728G:p.E243G,	chr12	31709394
nonsynonymous	Tgfbi:NM_009369:exon4:c.T315A:p.N105K,	chr13	56625216
nonsynonymous	Wdfy2:NM_175546:exon1:c.T98C:p.V33A,	chr14	62838018
nonsynonymous	Mtrf1:NM_145960:exon3:c.A121G:p.N41D,	chr14	79401550
nonsynonymous	Klhl1:NM_053105:exon5:c.T1050A:p.N350K,	chr14	96280189
nonsynonymous	Itgb7:NM_013566:exon14:c.G2203A:p.V735M,	chr15	102216582
nonsynonymous	Boc:NM_172506:exon15:c.A2498G:p.E833G,	chr16	44488650
nonsynonymous	Urb1:NM_029497:exon22:c.A3665G:p.Y1222C,	chr16	90774255
nonsynonymous	Synj1:NM_001164483:exon4:c.T374A:p.M125K,Synj1:NM_001045515:exon4:c.T254A:p.M85K,	chr16	90991605
nonsynonymous	Enpp4:NM_199016:exon2:c.G718A:p.D240N,	chr17	44101924
nonsynonymous	Tmem63b:NM_198167:exon24:c.G2359A:p.G787R,	chr17	45660929
nonsynonymous	Lama1:NM_008480:exon54:c.T7658C:p.I2553T,	chr17	67811452
nonsynonymous	Nrxn1:NM_177284:exon13:c.A2981G:p.D994G,Nrxn1:NM_020252:exon15:c.A3017G:p.D1006G,	chr17	90588724
nonsynonymous	9430020K01Rik:NM_001081963:exon3:c.G1747A:p.V583I,	chr18	4673986
nonsynonymous	Dcp2:NM_027490:exon9:c.G1051A:p.V351M,	chr18	44412624
nonsynonymous	Cobll1:NM_027225:exon11:c.A1828G:p.K610E,Cobll1:NM_177025:exon12:c.A1939G:p.K647E,	chr2	65099153
nonsynonymous	Olfr1045:NM_147017:exon1:c.A359G:p.Y120C,	chr2	86198392
nonsynonymous	Atg13:NM_145528:exon14:c.A1139G:p.E380G,	chr2	91679407
nonsynonymous	Siah2:NM_009174:exon2:c.C839T:p.T280I,	chr3	58676025
frameshift	Tiparp:NM_178892:exon5:c.1481_1488del:p.494_496del,	chr3	65552765
nonsynonymous	Igsf3:NM_207205:exon2:c.T38C:p.V13A,	chr3	101378487
nonsynonymous	Gbp2:NM_010260:exon5:c.A440T:p.E147V,	chr3	142629980
nonsynonymous	Ankrd6:NM_080471:exon2:c.A56G:p.Y19C,Ankrd6:NM_001012450:exon3:c.A56G:p.Y19C,Ankrd6:NM_001012451:exon2:c.A56G:p.Y19C,	chr4	32860386
nonsynonymous	Fkbp15:NM_001045528:exon25:c.A2725G:p.I909V,	chr4	62305152
nonsynonymous	Ttc22:NM_177667:exon7:c.A1286G:p.D429G,	chr4	106639040
nonsynonymous	S100pbp:NM_029036:exon3:c.A365G:p.N122S,	chr4	129182166
nonsynonymous	Phactr4:NM_001161797:exon3:c.A181G:p.T61A,Phactr4:NM_175306:exon3:c.A181G:p.T61A,	chr4	132386901
stopgain	Kif17:NM_010623:exon3:c.T417A:p.Y139X,Kif17:NM_001190978:exon3:c.T417A:p.Y139X,	chr4	138269884
nonsynonymous	Fam131c:NM_001085513:exon7:c.A800G:p.E267G,	chr4	141383625
nonsynonymous	Nub1:NM_016736:exon12:c.C1261T:p.R421W,	chr5	24706453
nonsynonymous	Lrrc8b:NM_001033550:exon5:c.T2314C:p.S772P,	chr5	105485977
nonsynonymous	Tpk1:NM_013861:exon9:c.G673T:p.G225C,	chr6	43346841
nonsynonymous	Vmn1r5:NM_134174:exon1:c.T7C:p.S3P,	chr6	56985348
nonsynonymous	Ccdc106:NM_146178:exon3:c.A211G:p.R71G,	chr7	5058066
nonsynonymous	Vmn1r167:NM_001101562:exon1:c.T435A:p.F145L,	chr7	23505155
nonsynonymous	Muc5b:NM_028801:exon26:c.T3451C:p.W1151R,	chr7	141855631
stopgain	Col4a1:NM_009931:exon22:c.A1378T:p.K460X,	chr8	11233831
nonsynonymous	Slc9a5:NM_001081332:exon16:c.G2558A:p.R853H,	chr8	105368336
nonsynonymous	Tat:NM_146214:exon9:c.T989G:p.I330S,	chr8	109996870
nonsynonymous	Sin3a:NM_001110350:exon13:c.C1907T:p.A636V,Sin3a:NM_011378:exon14:c.C1907T:p.A636V,Sin3a:NM_001110351:exon14:c.C1907T:p.A636V,	chr9	57107403
nonsynonymous	Tle3:NM_009389:exon15:c.C1493A:p.T498K,Tle3:NM_001083927:exon15:c.C1523A:p.T508K,Tle3:NM_001083928:exon15:c.C1469A:p.T490K,	chr9	61412420
nonsynonymous	Cgnl1:NM_026599:exon10:c.A2650G:p.K884E,	chr9	71655346
nonsynonymous	Nedd4:NM_010890:exon19:c.A1613G:p.N538S,	chr9	72735053
splicing	Cyp4a14(NM_007822:exon12:c.1279-2A>T)	chr4	115489867

## Sheet: 520 
Mut Type	Gene and Mut	Chromo	Coordinate
nonsynonymous	Gli1:NM_010296:exon7:c.T566C:p.M189T,	chr10	127336706
nonsynonymous	Olfr815:NM_146670:exon1:c.T92A:p.I31N,	chr10	129902635
nonsynonymous	Clint1:NM_001045520:exon12:c.T1730C:p.M577T,	chr11	45909145
nonsynonymous	Fnip1:NM_173753:exon17:c.C3379A:p.Q1127K,	chr11	54513445
nonsynonymous	Dnah9:NM_001099633:exon22:c.T4822C:p.S1608P,	chr11	66080539
nonsynonymous	Asic2:NM_001034013:exon10:c.A1504C:p.T502P,Asic2:NM_007384:exon10:c.A1657C:p.T553P,	chr11	80881092
nonsynonymous	Sema4d:NM_001281880:exon17:c.A1703T:p.H568L,Sema4d:NM_013660:exon16:c.A1703T:p.H568L,	chr13	51703492
nonsynonymous	Abcc4:NM_001163676:exon12:c.G1465A:p.A489T,Abcc4:NM_001033336:exon13:c.G1690A:p.A564T,Abcc4:NM_001163675:exon13:c.G1561A:p.A521T,	chr14	118611474
nonsynonymous	Cdh10:NM_009865:exon5:c.A736T:p.M246L,	chr15	18966831
nonsynonymous	Pigz:NM_172822:exon3:c.G377A:p.R126H,	chr16	31944502
nonsynonymous	Ephx3:NM_001033163:exon3:c.G545T:p.R182L,	chr17	32188545
stopgain	Nelfe:NM_001045863:exon8:c.T783A:p.Y261X,Nelfe:NM_138580:exon8:c.T783A:p.Y261X,Nelfe:NM_001045864:exon8:c.T783A:p.Y261X,	chr17	34854273
nonsynonymous	Ehd1:NM_010119:exon5:c.A1351G:p.I451V,	chr19	6298344
nonsynonymous	Kansl3:NM_172652:exon14:c.A1708G:p.T570A,	chr1	36348558
nonsynonymous	Coq10b:NM_001039710:exon2:c.A185G:p.E62G,	chr1	55061343
nonsynonymous	Calcrl:NM_018782:exon8:c.T331C:p.F111L,	chr2	84370104
nonsynonymous	Prnd:NM_001126338:exon2:c.T200G:p.L67R,Prnd:NM_023043:exon2:c.T200G:p.L67R,Prnd:NM_001278520:exon2:c.T200G:p.L67R,Prnd:NM_001278257:exon2:c.T200G:p.L67R,Prn:NM_001278259:exon4:c.T254G:p.L85R,Prn:NM_001278258:exon4:c.T254G:p.L85R,	chr2	131953215
nonsynonymous	Pcdh18:NM_130448:exon1:c.A1472G:p.D491G,	chr3	49755393
nonsynonymous	Tigd4:NM_207278:exon1:c.A1033G:p.S345G,	chr3	84594810
nonsynonymous	Fmo5:NM_001161765:exon7:c.C1250G:p.A417G,Fmo5:NM_010232:exon8:c.C1250G:p.A417G,Fmo5:NM_001161763:exon8:c.C1250G:p.A417G,	chr3	97650701
nonsynonymous	Mpdz:NM_010820:exon18:c.T2368A:p.S790T,	chr4	81358718
stopgain	Kdm4a:NM_001161823:exon4:c.T396A:p.Y132X,Kdm4a:NM_172382:exon4:c.T396A:p.Y132X,	chr4	118169955
nonsynonymous	Kdm1a:NM_133872:exon1:c.C137A:p.T46K,	chr4	136602449
nonsynonymous	Tmem132c:NM_175432:exon2:c.T208A:p.F70I,	chr5	127359656
nonsynonymous	Vmn1r7:NM_001166710:exon1:c.T476C:p.V159A,	chr6	57024798
nonsynonymous	Mark4:NM_172279:exon7:c.T519A:p.H173Q,	chr7	19445139
nonsynonymous	Cd22:NM_009845:exon13:c.A2414G:p.Q805R,Cd22:NM_001043317:exon15:c.A2414G:p.Q805R,	chr7	30867079
nonsynonymous	Vstm2b:NM_021387:exon4:c.T566C:p.V189A,	chr7	40902698
nonsynonymous	Herc2:NM_010418:exon90:c.T13877A:p.L4626Q,	chr7	56228577
nonsynonymous	Olfr509:NM_146372:exon1:c.A578T:p.H193L,	chr7	108645997
nonsynonymous	Slx1b:NM_029420:exon3:c.T450A:p.F150L,	chr7	126692441
nonsynonymous	Zfp629:NM_177226:exon3:c.A2552G:p.E851G,	chr7	127610084
nonsynonymous	4933402J07Rik:NM_177901:exon6:c.T704A:p.I235N,	chr8	87588987
nonsynonymous	Adat1:NM_013925:exon3:c.T227A:p.M76K,	chr8	111989862
nonsynonymous	Piezo1:NM_001037298:exon37:c.T5201C:p.V1734A,	chr8	122487020
nonsynonymous	Zfp599:NM_181419:exon5:c.T1028C:p.M343T,	chr9	22249840
nonsynonymous	Vprbp:NM_001015507:exon19:c.A3865G:p.T1289A,	chr9	106863680
splicing	Ascc2(NM_029291:exon7:c.720+2T>G)	chr11	4658327
splicing	Slc7a2(NM_007514:exon5:c.832+2T>C,NM_001044740:exon5:c.832+2T>C)	chr8	40904581

[truncated: 65 more sheets: 591, 604, 620, 722, 747, 752, 4604, 4633, 4654, 4751, 4799, 905_20N, 918_15L, 933_15N, J_57L, A_27R, A_83L, A_87N, A_120N, A_134L …]
