# Supplementary material for: Suppressor mutations in Mecp2-null mice implicate the DNA damage response in Rett syndrome pathology
Source: Genome Res. 2020 Apr;30(4):540–52. doi: 10.1101/gr.258400.119 (PMC7197480; doi:10.1101/gr.258400.119)
Supplement: Supplemental Material [file supp_gr.258400.119_Supplemental_Table_S2_.xlsx]

## Sheet: Summary
Line: Click on number to navigate to the page for that line.		352	N2 family	Total N3 Mecp2/Y	Improved		1395	N2 Family	Mecp2/Y	Improved
352*			male 1	30	9			male 1	77	37
856*			male 2	14	4			male 2	62	23
895*			male 3	26	10			male 3	18	2
520			male 4	30	2			male 4	22	2
4654*			male 5	26	10			female 5	13	5
4751*			male 6	3	1			female 6	4	1
4799*			6/6	129	36			6/6	196	70
918_15L*
J_57L		856	N2 family	Total N3 Mecp2/Y	Improved		1527	N2 Family	Mecp2/Y	Improved
A_27R			2	35	20			male 1	3	0
A_333N			9	17	10			female 2	24	12
M_199LL*			11	17	12			female 3	5	1
M_333R*			1	9	2			female 4	16	3
1395*			3	20	12			female 5	16	6
1527			6	10	4			female 11	13	2
136*			10	23	5			female 12	12	7
137*			12	8	5			female 13	17	1
591			13	10	4			female 14	16	6
722			14	16	2			female 19	18	10
933_15N			10/10	165	76			female 41	8	2
A_87N								female 42	22	1
A_120N		895	N2 family	Total N3 Mecp2/Y	Improved			female 43	10	6
A_134L*			male 1	19	6			female 44	10	4
			male 2	18	1			13/14	190	61
Legend to Supplemental_Table_S2: Breeding data for lines			male 3	4	0
			female 4	9	2		136	N2 Family	Mecp2/Y	Improved
* Line mated naturally			female 5	19	9			136-2m	19	2
To go to an individual tab, click on the line number:			female 6	21	3			136-3m	15	1
Green highlight = N3 animal was sequenced			female 7	10	8			136-30m	12	1
Light green highlight = possible improvement			female 8	3	2			136-5m	10	2
red font = animal died early, was not considered in analysis			female 9	6	1			136-34m	2	0
limb clasp=score totals weeks 5-7 (out of 8) improved <= 2			8/9	109	32			136-8f	3	0
activity = score totals weeks 5-8 (out of 8), improved <= 2								136-10f	15	3
tone = score totals weeks 5-7 (out of 8) improved <= 2								136-13f	2	0
nr = not recorded		520	N2 Family	Mecp2/Y	Improved			136-12f	11	2
sac = sacrificed			2101	9	1			136-26f	9	1
F/D = found dead			2102	19	4			136-6f	6	0
			2105	15	3			7/11	104	12
			2106	11	2
			2109	17	3		137	N2 Family	Mecp2/Y	Improved
			2110	12	1			137-13m	12	0
			2120	12	1			137-14m	16	2
			2122	21	4			137-15m	10	3
			8/8	116	19			137-24m	5	0
								137-8f	10	0
		4654	N2 Family	Mecp2/Y	Improved			137-10f	6	0
			5268	7	0			137-6f	13	1
			5269	10	2			137-7f	14	0
			5270	12	2			137-19f	12	1
			5271	10	0			137-20f	3	0
			5272	12	1			7/10	101	7
			5273	8	1
			5274	5	0		591	N2 Family	Mecp2/Y	Improved
			5275	6	0			3018	12	1
			5276	11	2			3019	15	1
			5/9	81	8			3020	12	2
								3021	11	0
		4751	N2 Family	Mecp2/Y	Improved			3026	15	1
			4751-1N	12	3			3027	12	0
			4751-2N	17	0			3028	19	1
			4751-3L	17	3			3029	10	1
			4751-4R	10	3			3030	8	0
			4751-5LL	14	1			7/9	114	7
			4751-6RR	11	3
			5/6	81	13		722	N2 Family	Mecp2/Y	Improved
						MAL		2142	11	0
		4799	N2 Family	Mecp2/Y	Improved	1		2143	11	2
			5068	10	0	3		2144	7	0
			5070	12	2	4		2145	5	3
			5071	12	0	2		2146	11	0
			5072	7	0	2		2147	11	0
			5073	11	2	5		2148	10	0
			5074	10	3	3		2149	11	0
			5075	8	1	20		2150	13	2
			4/7	70	8			2151	12	1
								4/10	102	8
		918_15N	N2 Family	Mecp2/Y	Improved
			5061	13	3		933_15N	N2 Family	Mecp2/Y	Improved
			5062	10	2			4166	10	0
			5063	13	0			4167	9	2
			5064	3	0			4168	16	1
			5065	12	2			4169	12	1
			5066	9	0			4170	15	0
			3/6	60	7			4171	14	1
								4172	13	0
		J_57L	N2 Family	Mecp2/Y	Improved			4173	9	0
			4339	17	6			4174	11	0
			4340	14	2			4175	9	0
			4342	9	1			4/10	118	5
			4343	13	0
			4344	12	5
			4345	7	1		A_87N	N2 Family	Mecp2/Y	Improved
			4346	13	0			4398	8	0
			4347	7	1			4399	13	0
			4348	16	2			4400	12	1
			7/9	108	18			4401	12	2
								4402	12	0
		A_27R	N2 Family	Mecp2/Y	Improved			4403	15	2
			4470	6	0			4404	6	0
			4471	11	1			4405	12	0
			4472	6	0			4406	13	3
			4473	8	0			4/9	95	8
			4474	11	0
			4475	9	0		A_120N	N2 Family	Mecp2/Y	Improved
			4476	17	6			5081	13	2
			4477	13	0			5082	10	3
			4478	12	1			5083	11	3
			4479	10	0			5084	10	0
			3/10	103	8			5086	11	0
								5087	6	0
		A_333N	N2 Family	Mecp2/Y	Improved			5085	9	0
			5181	2	0			3/7	70	8
			5182	12	1
			5185	9	0		A_134L	N2 Family	Mecp2/Y	Improved
			5186	11	4			A134-1N	16	2
			5187	11	4			A134-2L	21	0
			5188	10	0			A134-3R	27	5
			5184	2	0			A134-4LL	10	1
			5183	5	0			A134-6L	10	0
			3/8	62	9			3/5	84	8
		M_199LL	N2 Family	Mecp2/Y	Improved
			1N	9	1
			2L	9	3
			3R	15	3
			4N	6	2
			6R	13	0
			4/5	52	9
		M_333R	N2 Family	Mecp2/Y	Improved
			1N	20	3
			2L	12	0
			3R	18	2
			4LL	16	1
			5N	8	2
			6R	14	2
			5/6	88	10

## Sheet: 352
N2 ID	N3 Male ID	Survival (weeks)	CHR16: PRDM15	This was the first line we did, so we mapped the locus to distal chromosome 16, then re-sequenced only a 3 MB region.
1	40	6		Because of the possibility of complex inheritance, we only genotyped families that showed the highest degree of improvement.
	80	6.5
	82	18							N2 Family	N3 Mecp2/Y	Improved
	84	11							1	30	9
	92	7							2	14	4
	97	8							3	26	10
	102	11							4	30	2
	103	22.5	het						5	26	10
	104	8							6	3	1
	117	5							6/6	129	36
	118	14.5
	144	13.5
	145	10.5
	146	8.5
	147	15
	152	14
	154	15.5
	164	11
	165	7.5
	166	8.5
	167	13.5
	208	8
	209	6.5
	210	12
	211	11
	212	14
	213	7
	225	8
	227	7.5
	229	11.5
2	50	12
	51	8
	56	16
	85	8
	106	9
	121	8
	132	15.5
	134	17.5
	170	12
	172	11
	175	10.5
	177	11
	178	14
	180	7.5
3	64	13
	86	18
	87	5
	135	10.5
	137	14
	141	9
	148	13
	181	12
	182	12
	183	9
	187	12
	188	12
	189	12
	191	9
	199	13
	236	10
	237	10
	239	7
	240	10
	241	7
	242	7
	277	7
	304	9
	310	11.5
	313	11.5
	314	11.5
	358	10
	361	10
	362	7.5
	363	7.5
4	16	34	het
	123	24.5	het
	68	22	het
	296	20	het
	198	19	het
	233	18.5	WT
	321	18	het
	266	16	het
	125	16	WT
	126	14.5	WT
	317	14	WT
	69	13	het
	234	13	WT
	320	13	het
	70	11	WT
	294	10	het
	127	9.5	WT
	318	9.5	WT
	336	9	WT
	337	9	WT
	316	6	WT
	328	5	WT
5	34	15	WT
	91	36	het
	116	21	het
	163	20.5	het
	223	19.5	het
	270	19.5	het
	162	16.5	WT
	235	14.5	het
	218	13.5	het
	114	13.5	het
	322	13	WT
	323	13	WT
	201	12	WT
	112	11	het
	155	11	het
	156	10.5	het
	224	10	WT
	202	9.5	WT
	272	9.5	het
	279	9.5	WT
	159	7.5	WT
	244	7	WT
	325	7	het
	115	6	WT
	304	5.5	WT
	326	5.5	WT
6	88	27.5	WT
	89	6	WT
	131	6	WT

## Sheet: 856
N2 ID	N3 Male ID	Survival (days)	Survival (weeks)	CHR3: ZZZ3	improvement defined as >14 weeks				N2 family	N3 Mecp2/Y	Improved
2	36	111	15.8571	het					2	35	20
	38	76	10.8571	wt					9	17	10
	39	65	9.28571	wt					11	17	12
	55	98	14	het					1	9	2
	56	121	17.2857	het					3	20	12
	57	72	10.2857	wt					6	10	4
	59	66	9.42857	wt					10	23	5
	84	106	15.1429	het					12	8	5
	105	229	32.7143	het					13	10	4
	126	101	14.4286	het					14	16	2
	140	209	29.8571	het					10/10	165	76
	141	78	11.1429	wt
	158	98	14	het
	160	98	14	wt
	170	72	10.2857	het
	171	113	16.1429	het
	209	98	14	het
	210	85	12.1429	het
	211	193	27.5714	het
	212	85	12.1429	wt
	230	77	11	wt
	231	80	11.4286	wt
	232	178	25.4286	het
	234	87	12.4286	het
	303	105	15	het
	304	196	28	wt	All markers WT
	365	131	18.7143	wt
	385	106	15.1429	wt
	392	79	11.2857	wt
	408	133	19	wt
	410	82	11.7143	wt
	470	81	11.5714	wt
	472	80	11.4286	wt
	512	134	19.1429	het
	517	161	23	het	Marker MIT195 is het
9	197	51	7.28571	wt
	199	69	9.85714	wt
	201	68	9.71429	wt
	206	71	10.1429	wt
	220	102	14.5714	het
	223	119	17	wt
	232	178	25.4286	het
	257	138	19.7143	het
	275	159	22.7143	het
	324	74	10.5714	wt
	326	109	15.5714	wt
	329	100	14.2857	het
	425	113	16.1429	wt
	485	208	29.7143	het
	486	160	22.8571	het
	509	81	11.5714	het
	510	81	11.5714	het
11	213	189	27	het
	214	122	17.4286	wt
	217	91	13	het
	236	195	27.8571	het
	256	151	21.5714	het
	257	138	19.7143	het
	258	82	11.7143	wt
	259	52	7.42857	wt
	261	108	15.4286	het
	282	143	20.4286	wt
	285	246	35.1429	het
	286	102	14.5714	wt
	423	158	22.5714	het
	464	135	19.2857	het
	476	183	26.1429	wt
	477	70	10	wt
	479	69	9.85714	wt
1	34	69	9.85714
	35	117	16.7143
	85	53	7.57143
	101	62	8.85714
	102	42	6
	172	47	6.71429
	173	84	12
	174	84	12
	305	124	17.7143
3	40	133	19
	45	95	13.5714
	94	63	9
	96	119	17
	97	61	8.71429
	98	100	14.2857
	127	99	14.1429
	128	99	14.1429
	147	112	16
	148	111	15.8571
	152	80	11.4286
	164	65	9.28571
	165	149	21.2857
	166	127	18.1429
	167	31	4.42857
	226	61	8.71429
	228	54	7.71429
	291	161	23
	294	77	11
	295	141	20.1429
6	19	68	9.71429
	20	103	14.7143
	50	88	12.5714
	78	32	4.57143
	79	58	8.28571
	145	68	9.71429
	186	107	15.2857
	187	151	21.5714
	188	47	6.71429
	189	163	23.2857
10	179	74	10.5714	wt
	192	65	9.28571	wt
	194	135	19.2857	wt
	241	68	9.71429	wt
	267	81	11.5714	wt
	268	68	9.71429	wt
	278	71	10.1429	wt
	279	71	10.1429	wt
	280	83	11.8571	wt
	317	84	12	wt
	318	111	15.8571	wt
	319	84	12	wt
	331	71	10.1429	wt
	350	66	9.42857	wt
	355	64	9.14286	wt
	371	107	15.2857	wt
	372	85	12.1429	wt
	374	71	10.1429	wt
	376	61	8.71429	wt
	381	78	11.1429	wt
	382	78	11.1429	wt
	405	108	15.4286	wt
	406	108	15.4286	wt
12	15	66	9.42857
	69	118	16.8571
	113	106	15.1429
	115	106	15.1429
	117	59	8.42857
	142	99	14.1429
	143	47	6.71429
	144	109	15.5714
13	26	85	12.1429
	28	103	14.7143
	51	107	15.2857
	54	125	17.8571
	73	60	8.57143
	106	67	9.57143
	107	67	9.57143
	109	53	7.57143
	133	43	6.14286
	134	96	13.7143
14	30	107	15.2857	wt
	31	61	8.71429	wt
	60	76	10.8571	wt
	62	82	11.7143	wt
	65	60	8.57143	wt
	90	51	7.28571	wt
	118	62	8.85714	wt
	155	52	7.42857	wt
	157	121	17.2857	wt
	180	67	9.57143	wt
	314	63	9	wt
	315	93	13.2857	wt
	338	94	13.4286	wt
	339	83	11.8571	wt
	348	73	10.4286	wt
	367	58	8.28571	wt
							Total

## Sheet: 895
N2	N3	Survival (weeks)	CHR15: Sqle	CHR18: Rbbp8		N4	N5	Survival (weeks)	CHR15: Sqle	CHR18: Rbbp8		N2 family	Total N3 Mecp2/Y	Improved
male 1	154	29	WT	HET		f303 from m64	360	13	WT	WT		male 1	19	6
	113	11	HET				361	13	WT	WT		male 2	18	1
	114	11	WT				362	13	HET	WT		male 3	4	0
	116	12.5	WT				363	10	HET	WT		female 4	9	2
	119	12.5	HET				364	13	HET	WT		female 5	19	9
	134	6.5	HET				383	10	HET	WT		female 6	21	3
	135	9	HET				422	10	WT	WT		female 7	10	8
	136	9	WT				489	12.5	HET	WT		female 8	3	2
	137	9	HET				501	11	HET	WT		female 9	6	1
	153	7	WT				503	15.5	HET	WT		8/9	109	32
	166	19	HET				504	10	HET	WT
	177	22	?
	182	7	WT			f304 from m64	367	13	WT	WT		N4 Family	Total N5 Mecp2/Y	Improved
	201	7	HET				439	10.5	WT	WT		f303 from m64	11	1
	202	7.5	WT				443	13.5	WT	WT		f304 from m64	14	0
	204	9	HET				505	9	WT	WT		f305 from m64	15	1
	238	17	HET				509	10	WT	WT		f401 from m88	7	1
	240	15.5	HET				510	9	WT	WT		f402 from m88	8	5
	242	14	HET				543	9	WT	WT		f403 from m88	8	3
							544	9	WT	WT		f405 from m88	7	2
male 2	107	13	WT				545	8	WT	WT		f406 from m88	4	3
	109	8	WT				589	10	WT	WT		f410 from m88	2	2
	110	12	WT				592	10	WT	WT		f411 from m88	3	0
	111	13	WT				673	9	WT	WT		f412 from m88	7	2
	138	11.5	WT				674	9	WT	WT		f413 from m88	9	4
	139	9	HET				675	6	WT	WT		f414 from m88	11	4
	141	11.5	HET									m416 from m88	11	6
	155	8	HET			f305 from m64	388	10.5	HET	WT		m417 from m88	30	12
	157	8	HET				389	10	WT	WT		m418 from m88	5	4
	183	7	WT				390	10	WT	WT		m419 from m88	12	7
	184	11	WT				429	12.5	WT	WT		15/17	164	57
	187	12	WT				497	10	HET	WT
	188	11	HET				498	10	HET	WT
	189	10	WT				531	14	WT	WT
	227	7.5	HET				532	13	WT	WT
	231	7.5	HET				606	14	WT	WT
	248	8.5	HET				607	14	WT	WT
	295	18.5	HET				641	8.5	WT	WT
							676	9	HET	WT
3m	144	8	WT				678	9	WT	WT
	173	8.5	WT				680	8.5	HET	WT
	237	7	WT				681	8.5	HET	WT
	252	7	WT
						f401 from m88	593	14	WT	WT
female 4	8	15	WT				659	9	WT	WT
	13	7	HET				660	10	WT	WT
	34	12.5	HET				739	13	WT	WT
	68	7	WT				742	13	WT	WT
	70	13	HET				743	13	WT	WT
	99	13	HET				818	11	WT	WT
	131	9	HET
	132	9	HET			f402 from m88	476	6	WT	WT
	164	17	WT				478	11	WT	WT
							479	19	HET	WT
female 5	64	116	HET	HET			566	20	WT	HET
	88	39.5	HET	HET			643	15	WT	HET
	18	35.5	HET	HET			699	30	HET	HET
	76	32	WT	HET			701	30	WT	HET
	72	17.5	HET	WT			822	10	WT	WT
	45	16	WT	HET
	130	15.5	HET	WT		f403 from m88	473	14	WT	WT
	150	15.5	WT	HET			474	14	HET	WT
	42	14	HET	WT			523	5	WT	WT
	89	13.5	?	?			524	9	WT	WT
	73	12.5	HET	WT			526	9	WT	WT
	148	12.5	WT	WT			564	20	HET	WT
	43	12	HET	WT			688	9.5	HET	WT
	16	11	HET	WT			690	9	WT	WT
	5	9	HET	WT
	86	9	WT	WT		f405 from m88	493	11	HET	WT
	146	9	HET	WT			496	11	HET	WT
	74	8.5	WT	WT			534	9.5	HET	WT
	7	7	WT	WT			596	40.5	HET	HET
							599	18.5	HET	WT
							668	12	HET	WT
							671	12	WT	WT
female 6	3	8	WT
	22	11.5	WT			f406 from m88	852	15.5	HET	WT
	25	15.5	WT				855	15.5	WT	HET
	26	8.5	WT				857	9.5	WT	WT
	48	7	WT				858	15.5	HET	WT
	50	9	WT
	55	11	WT			f410 from m88	864	15	HET	WT
	60	9	WT				865	15	WT	HET
	61	7.5	WT
	83	9	WT			f411 from m88	605	13	WT	WT
	94	15.5	WT				624	11.5	WT	WT
	96	8.5	WT				625	11.5	WT	WT
	97	15.5	WT
	124	11	WT			f412 from m88	444	13	HET	WT
	128	5	WT				521	14	WT	WT
	159	8.5	WT				626	12.5	WT	WT
	161	8.5	WT				627	12.5	HET	WT
	162	5	WT				722	15	WT	HET
	196	7	WT				723	19	WT	HET
	243	4	WT				724	9	WT	WT
	246	4	WT
						f413 from m88	446	16	WT	HET
female 7	29	23.5	HET				449	8	WT	WT
	123	18	HET				602	9	WT	WT
	82	17	HET				603	15	WT	HET
	90	15.5	HET				618	12.5	WT	WT
	32	14.5	HET				620	12.5	WT	WT
	71	12.5	HET				621	16	WT	HET
	39	8	WT				622	12.5	WT	WT
	218	18	HET				729	14	WT	WT
	220	31	WT	HET
	289	12	HET			f414 from m88	450	10.5	WT	WT
							453	10.5	WT	WT
female 8	145	15	WT				454	10.5	WT	WT
	206	29	HET	HET			540	9	WT	WT
	257	12	HET				572	15	WT	HET
							575	15	WT	HET
female 9	172	8	HET				576	8	WT	WT
	214	8.5	HET				613	14	WT	WT
	253	9	WT				638	11	WT	WT
	255	12.5	HET				640	11	WT	WT
	276	18	WT				709	14	WT	WT
	289a	12	HET
						m416 from m88	703	30	WT	HET
							704	14.5	WT	HET
							705	18	HET	?
							706	23	WT	HET
							774	4	HET	WT
							775	14	HET	WT
							785	12	WT	WT
							786	12	HET	WT
							787	12	HET	WT
							863	16	HET	WT
							871	8	HET	WT
						m417 from m88	662	12	WT	WT
							664	12	WT	WT
							665	12	WT	WT
							666	12	WT	WT
							693	9.5	WT	WT
							696	8	WT	WT
							697	10	WT	WT
							730	13.5	HET	WT
							731	19.5	HET	WT
							732	15.5	HET	WT
							734	12	WT	WT
							736	20.5	WT	HET
							737	6.5	WT	WT
							738	12	WT	WT
							759	11.5	WT	WT
							761	11.5	WT	WT
							778	13	WT	WT
							779	23.5	WT	HET
							780	4	WT	WT
							788	12	WT	WT
							791	12	WT	WT
							792	22	WT	HET
							802	15	HET	WT
							803	20	HET	WT
							805	11.5	WT	WT
							807	13	WT	WT
							808	20	WT	HET
							809	20	WT	HET
							810	20	WT	HET
							862	15	WT	HET
						m418 from m88	832	17.5	WT	HET
							834	14.5	WT	HET
							846	12	WT	WT
							847	16	WT	HET
							849	16	WT	HET
						m419 from m88	797	12	WT	WT
							811	12	WT	WT
							812	10	WT	WT
							813	20	WT	HET
							816	20	WT	HET
							827	7.5	WT	WT
							829	17.5	WT	HET
							842	16.5	WT	HET
							877	14	WT	WT
							882	14.5	WT	HET
							883	14.5	WT	HET
							884	10	WT	WT

## Sheet: 520
N2 ID	N3 Male ID	Weight (g)	HS@8wk	Limb clasp	Activity	Tone	Survival (Weeks)	Comments	CHR7: Mark4	CHR7: CD22	CHR11: Clint1	CHR11: Fnip1	CHR4: Kdm4a	Partially Genotyped	N2 Family	Mecp2/Y	WT	Grand Total	Improved
2106	116N	29	4	4	2	1	17	sac	HET	HET	WT	HET	WT	CHR3: Pcdh18	2101	9	9	18	1
	154L	45	3	4	0	2	15	sac	HET	HET	HET	HET	WT	CHR3: Tigd4	2102	19	22	41	4
	14N	35	8	nr	nr	nr	8	FD	WT	WT	WT	WT	HET	CHR3: Fmo5	2105	15	21	36	3
	15L	37	6	5	3	5	7	sac	HET	HET	WT	WT	HET	CHR7: Vstm2b	2106	11	14	25	2
	67L	31	7	3	3	3	7	sac	HET	HET	HET	HET	HET	CHR8: Slc7a2	2109	17	12	29	3
	69LL	33	8	6	5	5	7	sac	WT	WT	WT	HET	WT	CHR9: Vprbp	2110	12	12	24	1
	247L	29	8	6	5	6	7	sac	HET	HET	WT	WT	WT	CHR10:Gli1	2120	12	12	24	1
	248R	38	6	5	4	4	7	sac	HET	HET	HET	WT	WT	CHR11: Dnah9	2122	21	15	37	4
	117L	23	nr	nr	nr	nr	6	FD							8/8	116	117	234	19
	118R	23	nr	nr	nr	nr	7	FD
	66N						5	SAC
2105	182N	39	3	3	0	0	12	sac	HET	HET	WT	WT	WT
	198L	23	4	5	0	0	11	FD	HET	HET	WT	WT	WT
	200LL	29	3	5	0	0	12	sac	HET	HET	WT	WT	WT
	25LL	46	7	3	1	3	10	sac	WT	WT	WT	WT	WT
	77N	30	7	5	5	5	7	sac	HET	HET	WT	WT	WT
	79R	32	10	6	5	6	7	sac	HET	HET	WT	WT	WT
	130N	33	8	6	5	6	8	sac	WT	WT	WT	WT	WT
	184R	33	11	5	5	5	8	sac	WT	WT	WT	WT	WT
	197N	30	8	5	3	3	8	sac	WT	WT	WT	WT	WT
	201RR	32	7	3	3	3	8	sac	HET	HET	WT	WT	WT
	224L	24	6	4	3	3	8	sac	HET	HET	WT	WT	WT
	132R	11	4	nr	nr	nr	6	sac	WT	WT	WT	WT	WT
	249N	9	2	nr	nr	nr	6	FD	HET	HET	WT	WT	WT
	250L	15	nr	nr	nr	nr	6	FD	HET	WT	WT	WT	WT
	111R	23	nr	nr	nr	nr	6	FD
2102	126L	46	7	6	2	2	15	sac	WT	HET	HET	WT	WT
	127R	31	6	6	3	1	11	FD	WT	WT	WT	WT	HET
	62N	34	1	3	1	2	11	sac	WT	WT	WT	HET	?
	64R	31	4	2	2	1	10	sac	WT	HET	HET	HET	WT
	236LL	33	9	3	2	1	10	sac	WT	WT	?	WT	WT
	99N	28	7	2	2	2	9	sac	WT	HET	WT	WT	HET
	11N	36	4	6	5	5	6	sac	WT	HET	WT	WT	HET
	100L	21	12	6	6	6	8	sac	WT	WT	HET	HET	WT
	101R	17	5	5	5	5	6	sac	WT	HET	HET	HET	WT
	102LL	33	8	5	5	5	9	sac	WT	WT	WT	HET	WT
	159L	30	4	4	2	3	9	sac	WT	WT	WT	WT	WT
	251N	35	4	2	3	5	8	sac	WT	HET	WT	WT	HET
	252L	24	4	6	4	5	8	FD	WT	HET	WT	WT	WT
	233N	20	7	nr	nr	nr	6	FD	WT	WT	WT	WT	HET
	242N	28	7	nr	nr	nr	5	sac	WT	WT	WT	WT	WT
	206N	nr	nr	nr	nr	nr	5	FD
	234L	nr	nr	nr	nr	nr	5	FD
	167N						5	sac
	65LL						6	sac-endpont
2122	46L	50	3	4	2	3	20	sac	HET	HET	HET	HET	HET
	231LL	39	3	2	0	2	12	sac	HET	HET	WT	WT	HET
	237N	44	4	2	2	2	10	sac	WT	HET	WT	HET	HET
	168N	25	6	5	0	1	11	sac	HET	HET	HET	HET	HET
	45N	28	5	4	3	4	8	sac	HET	HET	WT	WT	WT
	89R	33	8	nr	nr	nr	7	sac-mal	?	WT	HET	HET	HET
	91L	30	9	4	2	3	9	sac	HET	HET	WT	WT	HET
	92R	25	8	4	2	3	9	sac	WT	HET	WT	WT	WT
	172N	9	8	nr	nr	nr	5	sac-mal	HET	HET	HET	HET	HET
	173L	31	8	4	3	3	8	sac-mal	HET	HET	WT	WT	WT
	228N	10	8	5	4	5	6	sac	WT	WT	WT	WT	WT
	230R	18	4	5	4	5	8	sac	HET	HET	WT	WT	WT
	238L	30	6	3	3	3	8	sac	HET	HET	WT	HET	HET
	254N	33	7	3	2	2	8	?	WT	WT	WT	WT	HET
	172N	9	8	nr	nr	nr	5	sac-mal	HET	HET	HET	HET	HET
	90N	13	nr	nr	nr	nr	5	FD
	174R	12	nr	nr	nr	nr	8	sac-mal
	185N	nr	nr	nr	nr	nr	5	FD
	188LL	nr	nr	nr	nr	nr	5	FD
	229L	10	nr	nr	nr	nr	6	FD
	232RR	nr	nr	nr	nr	nr	3	sac
2101	40L	43	6	5	0	2	13	sac	WT	WT	WT	WT	WT
	39N	20	5	2	2	3	9	FD-mal	WT	WT	HET	HET	WT
	41R	26	7	5	3	3	9	FD	WT	WT	HET	HET	WT
	82L	31	7	5	3	3	13	sac	WT	WT	WT	WT	WT
	1N	32	8	5	5	5	7	sac	WT	WT	HET	HET	WT
	3R	34	10	6	6	5	7	sac	WT	WT	HET	HET	WT
	42N	38	3	6	5	6	6	FD	WT	WT	HET	HET	WT
	220N	33	11	6	6	6	7	sac	WT	WT	WT	WT	WT
	241N	Sac < 5 weels
2120	59N	42	7	5	1	3	12	sac	HET	HET	WT	WT	HET
	8N	38	8	6	5	5	7	sac	WT	WT	WT	?	WT
	56N	27	4	6	6	6	6	sac	WT	WT	WT	?	HET
	58R	26	7	5	6	6	7	sac	WT	HET	WT	WT	HET
	104L	42	9	6	5	5	6	FD	HET	HET	WT	HET	WT
	105R	21	4	nr	nr	nr	6	FD	HET	HET	WT	HET	HET
	106N	35	7	6	4	3	8	FD	HET	HET	WT	HET	HET
	107L	22	1	nr	nr	nr	5	sac	WT	WT	WT	HET	HET
	108R	31	7	4	2	2	9	sac	WT	WT	WT	WT	HET
	147R	32	8	5	5	6	7	sac	HET	HET	WT	?	HET
	148LL	34	7	6	5	5	7	FD	HET	HET	WT	WT	HET
	196L	25	3	nr	nr	nr	6	FD	HET	HET	WT	?	HET
2109	26N	38	10	4	2	4	10	?	WT	WT	HET	HET	WT
	28R	45	9	5	3	4	9	FD	WT	WT	HET	?	WT
	29LL	41	7	3	1	1	10	sac	WT	WT	WT	?	WT
	76R	34	8	6	5	5	7	sac	WT	WT	WT	?	WT
	113N	21	4	3	0	0	10	sac-mal	WT	WT	HET	HET	WT
	114L	43	8	6	3	2	10	sac	WT	WT	WT	WT	WT
	138N	40	7	6	3	3	12	sac	WT	WT	WT	WT	WT
	139L	44	8	6	3	3	11	sac	WT	WT	HET	WT	WT
	140R	34	3	5	2	1	11	FD	WT	WT	WT	WT	WT
	165R	30	9	5	5	5	8	?	WT	WT	WT	WT	WT
	166LL	27	6	6	5	5	8	FD	WT	WT	HET	?	WT
	202N	31	6	6	0	0	9	sac	WT	WT	WT	WT	WT
	203L	34	6	6	0	0	9	sac	WT	WT	WT	WT	WT
	204R	23	3	5	6	6	7	FD	WT	WT	HET	?	WT
	215L	26	1	nr	nr	nr	6	?	WT	WT	HET	?	WT
	217N	18	7	6	5	5	7	sac-mal	WT	WT	HET	?	WT
	218L	28	6	6	3	4	8	sac	WT	WT	HET	WT	WT
2110	4N	29	6	5	5	5	7	sac	HET	?	WT	WT	WT
	7LL	27	8	5	6	6	7	sac	WT	?	WT	WT	HET
	5L	22	2	nr	nr	nr	6	FD	WT	?	WT	WT	HET
	71N	NR	nr	nr	nr	nr	5	sac	HET	?	WT	WT	HET
	72L	31	4	3	0	2	10	?	HET	?	WT	WT	HET
	73R	14	0	nr	nr	nr	6	FD	WT	?	WT	WT	HET
	151R	12	4	nr	nr	nr	5	sac	HET	?	WT	WT	HET
	193N	24	7	5	5	5	7	sac	HET	?	WT	WT	WT
	194L	24	7	5	5	5	7	sac	WT	?	WT	WT	HET
	212R	32	7	3	3	2	9	?	WT	?	WT	WT	WT
	213LL	23	2	5	4	4	8	FD	HET	?	WT	WT	WT
	152LL	Sac < 5 weels

## Sheet: 4654
N2 ID	N3 Male ID	Weight (g)	HS@8wk	Limb clasp	Activity	Tone	Survival (Weeks)	Comments	CHR2: Gtf3c5	CHR9: Dennd4a	CHR19: Tm7sf2	Partially Genotyped	N2 Family	Mecp2/Y	WT	Grand Total	Improved
5268	4654-11N	40	8	4	2	3	8	sac	WT	HET	WT	CHR16: Crebbp	5268	7	6	13	0
	4654-15RR	23	1.5	nr	nr	nr	7	F/D	WT	WT	WT		5269	10	9	19	2
	4654-16N	23	8	3	3	4	8	sac	WT	HET	WT		5270	12	17	29	2
	4654-17L	26	7	3	2	2	8	sac	WT	WT	HET		5271	10	13	23	0
	4654-58L	23	6	2	2	2	6	F/D	WT	HET	HET		5272	12	6	18	1
	4654-89N	16	3	nr	nr	nr	5	sac-mal	WT	WT	WT		5273	8	8	16	1
	4654-91R	14	4	nr	nr	nr	5	sac-mal	WT	HET	WT		5274	5	5	10	0
													5275	6	5	11	0
5269	4654-27R	31	7	5	5	5	7	sac	WT	WT	WT		5276	11	10	21	2
	4654-28LL	28	6	2	0	2	10	F/D	WT	WT	WT		5/9	81	79	160	8
	4654-29RR	31	7	5	4	5	7	sac	HET	WT	WT
	4654-30N	30	9	6	5	5	7	sac	HET	WT	WT
	4654-76L	19	2	nr	nr	nr	6	sac		WT	WT
	4654-77R	35	9	6	4	5	7	sac	WT	WT	WT
	4654-78LL	31	4	0	0	2	10	sac	HET	WT	WT
	4654-115L	27	6	5	4	5	7	sac	WT	WT	WT
	4654-123R	nr	nr	nr	nr	nr	nr	MIA
	4654-135N	nr	nr	nr	nr	nr	nr	MIA
5270	4654-9LL	31	5	5	2	1	9	sac	WT	WT	HET
	4654-60L	23	4	3	3	3	8	sac	HET	HET	HET
	4654-62LL	33	6	4	5	5	7	F/D		WT	WT
	4654-100N	24	6	5	5	5	7	sac	WT	WT	WT
	4654-101N	20	7	4	4	5	5	sac	WT	WT	WT
	4654-102L	22	6	2	3	3	6	sac	HET	WT	HET
	4654-117LL	26	6	2	1	2	10	sac	HET	WT	HET
	4654-118RR	30	6	1	1	3	10	sac	HET	WT	WT
	4654-134R	21	2	nr	nr	nr	6	sac-mal		HET	WT
	4654-152N	25	1	nr	nr	nr	6	F/D		WT	HET
	4654-154R	27	7	3	3	3	7	sac	WT	WT	HET
	4544-132N						3	sac
5271	4654-19LL	30	8	3	3	4	8	sac		HET	WT
	4654-53L	28	2	nr	nr	nr	6	F/D		WT	WT
	4654-54R	29	4	nr	nr	nr	7	sac		WT	WT
	4654-55LL	26	5	nr	nr	nr	5	sac		WT	WT
	4654-69L	12	4	6	5	5	6	sac		WT	WT
	4654-94N	31	8	6	5	5	7	sac		HET	WT
	4654-95L	29	7	nr	nr	nr	5	sac		HET	WT
	4654-106L	22	5	2	3	4	8	sac-mal	WT	WT	WT
	4654-140RR	32	7	4	4	3	8	sac		WT	WT
	4654-141N	34	8	6	3	4	8	sac		HET	WT
5272	4654-21L	22	6	nr	nr	nr	6	sac-mal		WT	WT
	4654-23LL	35	7	2	2	4	8	sac	WT	HET	WT
	4654-24RR	28	5	nr	nr	nr	6	F/D	HET	WT	WT
	4654-50LL	29	3	5	4	4	7	sac	HET	HET	WT
	4654-52N	32	2	0	1	1	10	F/D	HET	WT	WT
	4654-86R	21	6	nr	nr	nr	6	F/D	?	HET	WT
	4654-87LL	31	7	5	5	5	7	sac	WT	HET	WT
	4654-88RR	31	7	5	5	5	7	sac	WT	?	WT
	4654-124N	34	8	4	3	5	8	sac	HET	WT	WT
	4654-136N	nr	nr	nr	nr	nr	nr	sac-mal		WT	WT
	4654-137L	27	7	4	5	6	7	sac	WT	WT	WT
	4654-138R	35	7	2	4	4	8	sac	HET	WT	WT
5273	4654-38L	34	8	3	1	2	8	sac	HET	WT	HET
	4654-39R	36	9	4	3	3	8	sac	HET	WT	WT
	4654-40LL	35	3.5	1	1	2	10	F/D	HET	WT	HET
	4654-79N	10	5	nr	nr	nr	5	sac		WT	HET
	4654-80L	31	9	nr	nr	nr	6	sac		WT	HET
	4654-81R	28	2	nr	nr	nr	5	sac		WT	HET
	4654-119N	20	4	nr	nr	nr	5	F/D		WT	WT
	4654-120L	21	5	4	5	5	7	sac	WT	WT	WT
5274	4654-33LL	35	9	5	5	5	7	sac		WT	WT
	4654-42N	15	8	5	6	6	6	sac-malc		WT	WT
	4654-43L	37	8	5	5	5	6	sac		WT	WT
	4654-44R	37	10	6	5	5	6	sac		WT	WT
	4654-93RR	29	8	5	6	6	7	sac		HET	WT
5275	4654-97N	33	6	5	4	5	6	sac	WT	WT	WT
	4654-126R	29	8	6	5	5	6	sac	WT	HET	WT
	4654-127LL	35	9	5	5	5	6	sac	WT	HET	WT
	4654-145L	33	5	4	4	4	7	sac	WT	HET	WT
	4654-146R	31	7	5	5	5	7	sac	WT	WT	WT
	4654-147LL	28	5	4	4	5	7	sac-malc	WT	HET	WT
5276	4654-73N	25	3	1	1	0	12	sac	HET	HET	HET
	4654-109N	13	7	5	6	6	5	sac		WT	WT
	4654-111R	31	4	5	4	4	7	F/D	HET	WT	WT
	4654-112LL	32	6	2	4	4	8	sac	WT	WT	WT
	4654-130N	27	3	4	4	4	7	F/D	WT	HET	WT
	4654-131L	27	2.5	nr	nr	nr	7	F/D	HET	HET	HET
	4654-149L	32	8	2	3	3	7	sac	HET	HET	HET
	4654-156N	17	7	nr	nr	nr	6	sac		WT	HET
	4654-158R	22	1	4	4	4	7	F/D	HET	WT	WT
	4654-159LL	27	5	0	1	2	12	sac	WT	HET	HET
	4654-74L						5	sac

## Sheet: 4751
N2 ID	N3 Male ID	Weight (g)	HS@8wk	Limb clasp	Activity	Tone	Survival (Weeks)	Comments	CHR7: Paox	CHR11: Argef15	CHR13: Spin1	Partially Genotyped	N2 Family	Mecp2/Y	WT	Grand Total	Improved
4751-1N	54N	26	7	6	4	4	8	sac	WT	WT	WT	CHR14:Adcy4	4751-1N	12	15	27	3
	61L	20	6	4	5	4	8	sac	WT	WT	HET	CHR14:Appl1	4751-2N	17	15	32	0
	63LL	20	8	6	6	6	6	sac	WT	WT	WT	CHR17:Pigf	4751-3L	17	11	29	3
	86L	22	5	4	5	4	7	sac	WT	WT	WT		4751-4R	10	18	27	3
	87R	21	5	4	5	5	7	sac	WT	WT	WT		4751-5LL	14	17	33	1
	88LL	25	7	4	6	6	7	sac	WT	WT	WT		4751-6RR	11	15	26	3
	147L	27	3	0	1	0	10	sac	WT	WT	WT		5/6	81	91	174	13
	159N	22	5	0	3	2	11	sac	WT	WT	HET
	160L	26	5	0	3	0	13	sac	WT	WT	HET
	161R	26	7	6	4	5	7	sac	WT	WT	WT
	59R	F/D	nr	nr	nr	nr	6	F/D
	62R	15	3	nr	nr	nr	7	F/D
4751-3L	6N	27	5	4	3	3	10	sac	HET	WT	HET
	7L	17	7	4	6	5	8	sac	HET	HET	HET
	25N	29	7	6	5	5	6	sac	HET	WT	WT
	26L	32	7	6	5	5	6	sac	WT	WT	WT
	49N	22	1	4	4	4	7	F/D	WT	WT	WT
	51R	36	8	6	1	1	10	sac	WT	HET	WT
	52LL	30	8	6	2	2	10	sac	HET	HET	WT
	53RR	31	7	5	1	1	9	sac	HET	HET	WT
	78N	27	3	1	0	0	8	sac	HET	WT	HET
	79L	25	3	3	0	2	8	sac	WT	HET	WT
	97N	26	3	2	0	0	12	sac	HET	HET	HET
	98L	28	8	6	5	5	6	sac	WT	WT	HET
	118R	22	2	5	4	4	7	sac	HET	WT	HET
	121R	31	5	nr	nr	nr	7	F/D
	150N	33	9	6	5	5	8.7	sac	WT	HET	HET
	80R	nr	nr	nr	nr	nr	5	F/D
	151L	nr	nr	nr	nr	nr	5	F/D
4751-4R	10L	35	8	6	6	6	7	sac	WT	WT	WT
	14R	33	7	6	5	5	7	sac	WT	HET	WT
	69LL	20	2	5	4	4	7	F/D	WT	WT	WT
	131L	29	2	4	1	1	9	sac	WT	HET	WT
	133N	30	7	6	5	5	7	sac	WT	HET	WT
	134L	26	6	1	2	1	13	sac	WT	WT	WT
	135R	26	3	4	1	1	9	sac	WT	HET	WT
	170LL	35	8	6	2	3	9	sac	WT	HET	WT
	23L	nr	nr	nr	nr	nr	7	F/D
	168L	nr	nr	nr	nr	nr	6	F/D
4751-6RR	42R	22	5	5	0	1	13	sac	HET	HET	HET
	66N	37	10	6	5	4	8	sac	WT	WT	WT
	111R	?	11	6	6	6	7	sac	WT	WT	WT
	112LL	32	4	3	2	2	8	F/D	WT	WT	WT
	114L	32	6	3	1	1	10	sac	WT	HET	WT
	115R	33	10	6	5	6	7	sac	HET	WT	WT
	144N	33	5	4	1	1	9	sac	HET	HET	WT
	157L	13	7	4	6	6	7	sac	HET	WT	HET
	175L	23	3	4	0	0	10	sac	WT	HET	WT
	176R	14	4	6	6	6	7	sac	HET	WT	WT
	15N	22	1	nr	nr	nr	5	F/D
4751-5LL	72R	31	7	5	4	4	10	sac	WT	WT	WT
	74RR	13	5	6	6	6	6	sac	WT	WT	WT
	100L	20	5	3	2	2	10	sac	WT	WT	WT
	102LL	22	5	6	2	2	10	sac	WT	WT	WT
	124R	29	5	6	5	5	8	sac	WT	WT	WT
	136N	25	6	5	5	5	8	sac	WT	WT	WT
	137L	31	5	6	6	6	7	sac	WT	WT	WT
	154L	13	6	5	6	5	7	sac	WT	WT	WT
	155R	33	8	6	5	5	7	sac	WT	WT	WT
	172L	28	5	2	2	2	10	sac	WT	WT	WT
	173R	29	6	6	4	6	8	sac	WT	WT	WT
	99N	nr	nr	nr	nr	nr	5	MIA
	125LL	12	3	nr	nr	nr	6	F/D
	126RR	18	6	nr	nr	nr	5	Sac-mal
4751-2N	4N	31	7	6	5	5	7	sac	WT	WT	WT
	5L	38	5	3	3	3	9	sac	WT	WT	WT
	31L	26	4	6	6	6	6	sac	WT	WT	WT
	44N	27	3	4	5	5	7	sac	WT	WT	WT
	47LL	27	2	6	6	6	6	sac	WT	WT	WT
	48RR	26	8	6	6	6	8	sac	WT	WT	WT
	83L	34	6	6	3	4	8	sac	WT	WT	WT
	92R	21	7	6	6	6	7	sac	WT	WT	WT
	93LL	31	6	6	5	5	6	sac	WT	WT	WT
	94N	31	7	5	4	3	8	sac	WT	WT	WT
	148N	29	4	6	3	2	9	sac	WT	WT	WT
	162N	37	8	6	4	5	7	sac	WT	WT	WT
	164R	27	7	6	6	6	6	sac	WT	WT	WT
	166RR	33	6	6	6	6	6	sac	WT	WT	WT
	46R	nr	nr	nr	nr	nr	5	sac
	142L	nr	nr	nr	nr	nr	5	F/D
	127N	Sac =3 weeks

## Sheet: 4799
N2 ID	N3 Male ID	Weight (g)	HS@8wk	Limb clasp	Activity	Tone	Survival (Weeks)	Comments	CHR 5: Atp8a1	CHR 5: Aacs	Partially genotyped	N2 Family	Mecp2/Y (C)	WT	Grand Total	Improved	Mecp2/Y	MAL		Other Genes Genotyped
5070	4799-50LL	18	4	2	1	2	6	sac-mal	HET	HET	chr15: Arc	5068	9	6	15	0	10	1		Arc
	4799-64R	31	5	1	0	0	10	sac	HET	HET	chr13: Ipo11	5070	9	18	27	2	12	3		ipo11
	4799-65LL	22	4	0	1	1	11	sac	HET	HET	chr7: Ube3a	5071	8	3	11	0	12	4		ube3a
	4799-102L	29	4	3	2	2	6	sac	HET	HET		5072	5	3	8	0	7	2
	4799-103R	35	8	4	2	2	6	sac	WT	HET		5073	9	10	19	2	11	2
	4799-122R	33	8	2	5	4	8	sac	HET	WT		5074	5	11	16	3	10	5
	4799-130R	24	5	6	6	6	6	sac-mal	WT	WT		5075	5	10	15	1	8	3
	4799-135LL	29	7	5	3	3	6	sac	WT	HET		4/7	50	61	111	8	70	20
	4799-137N	17	5	3	4	4	8	sac-mal	WT	WT
	4799-62N	26	1	nr	nr	nr	5	F/D	WT	WT
	4799-125L						6	sac
	4799-128N						6	sac
5071	4799-7R	24	4	3	3	3	9	F/D	WT	WT
	4799-8LL	19	8	6	5	6	7	sac-mal	WT	WT
	4799-46LL	27	8	6	6	5	6	sac	WT	WT
	4799-55N	24	4	3	3	3	10	sac	WT	WT
	4799-56L	31	4	nr	nr	nr	7	F/D	WT	WT
	4799-89LL	30	7	5	6	5	6	sac	HET	WT
	5N						7	endpoint
	6L						6	sac-mal
	43N						6	sac-mal
	45R						5	sac-mal
	56L						7
	72L						<5	F/D
5073	4799-2L	32	7	4	4	3	8	sac	WT	WT
	4799-28N	29	3	2	1	2	10	sac	HET	HET
	4799-32RR	16	7	5	5	6	6	sac-mal	WT	WT
	4799-33N	34	6	3	4	4	9	sac	WT	WT
	4799-73R	13	8	nr	nr	nr	5	sac	WT	WT
	4799-85L	22	6	3	2	2	10	sac	HET	HET
	4799-105N	27	6	nr	nr	nr	7	sac	HET	HET
	4799-115N	26	8	5	4	4	8	sac	WT	WT
	4799-116L	19	4	nr	nr	nr	6	sac-mal	HET	HET
	30R						?	MIA
	109L						5	sac
5074	4799-15L	25	3	0	2	2	9	sac-mal	HET	HET
	4799-87L	30	8	6	6	6	6		WT	WT
	4799-95L	25	6	2	1	2	12		HET	HET
	4799-113N	19	7	5	6	5	7	sac-mal	WT	WT
	4799-117N	24	3	1	1	2	12	rescue	HET	HET
	4799-118L	16	6	nr	nr	nr	6	sac-mal	WT	WT
	114L						5	sac-mal
	126N	sac=3 weeks					3	terrible
	132N						4	sac-mal
	86N						6	sac
5075	4799-12LL	18	7	5	5	5	7	sac	HET	WT
	4799-13RR	23	7	5	5	5	7	sac	WT	WT
	4799-23N	34	5	6	6	6	7	F/D	HET	WT
	4799-53R	18	5	2	2	3	8	F/D	HET	HET
	4799-79N	26	2	4	4	5	7	sac-mal	WT	WT
	4799-84N	33	6	3	0	1	10	sac	HET	HET
	24L						6	sac-mal
	52L						5	sac-mal
5072	4799-17LL	21	4	4	2	2	7	sac	HET	HET
	4799-18RR	16	6	4	2	2	6	sac-mal	HET	HET
	4799-74N	24	7	5	5	5	7	sac	WT	WT
	4799-75L	34	8	4	4	4	8	sac	WT	WT
	4799-76R	24	6	3	2	2	8	sac-mal	HET	HET
	4799-77LL	31	7	2	1	1	8	sac	WT	HET
	47N						5	sac
5068	4799-9N	25	7	5	5	5	7		HET	WT
	4799-10L	23	7	5	5	5	7		HET	WT
	4799-11R	30	7	5	5	5	7	sac	WT	WT
	4799-36L	13	7	nr	nr	nr	5	sac	HET	WT
	4799-38N	27	7	nr	nr	nr	5	sac	HET	WT
	4799-58N	27	7	5	5	6	7	sac-mal	HET	WT
	4799-59L	31	8	4	3	4	8		WT	WT
	37R						5	sac
	91N						3	sac
	92L						3	sac

## Sheet: 918_15L
N2 ID	N3 Male ID	Weight (g)	HS@8wk	Limb clasp	Activity	Tone	Survival (Weeks)	Comments	Chr9: Celsr3	Partially Genotyped	N2 Family	Mecp2/Y	WT	Grand Total	Improved
5061	918-79R	29	2	0	0	0	12	sac	HET	CHR7: Kcnc3	5061	13	15	28	3
	918-50RR	23	3	2	1	2	11	sac	HET	CHR17:Foxnp4	5062	10	11	21	2
	918-48R	26	6	5	0	2	11	sac	HET	CHR19: Vldlr	5063	13	10	23	0
	918-109N	35	6	4	2	2	9	sac	WT		5064	3	1	4	0
	918-77N	29	5	5	0	2	9	sac	HET		5065	12	15	27	2
	918-80LL	22	5	2	0	2	8	sac	HET		5066	9	7	16	0
	918-116L	23	7	4	4	4	7	sac	WT		3/6	60	59	119	7
	918-110L	30	10	5	6	6	7	sac	WT
	918-99RR	29	4	nr	nr	nr	6	sac	HET
	918-96L	22	6	nr	nr	nr	6	F/D	HET
	918-49LL	16	7	5	5	5	7	MAL-sac	WT
	918-78L	23	1	nr	nr	nr	5	sac	WT
	918-11R	10	7	nr	nr	nr	6	MAL-sac	HET
5062	918-8L	25	4	1	1	0	14	sac	HET
	918-84N	23	3	0	0	0	11	MAL- SAC	HET
	918-34R	26	7	1	1	1	8	sac	HET
	918-2L	28	7	5	4	4	8	sac	WT
	918-65RR	33	9	5	4	4	7	sac	WT
	918-44L	31	8	5	5	5	7	sac	WT
	918-43N	35	9	6	5	5	7	sac	WT
	918-40N	36	4	5	5	5	7	sac	WT
	918-41L	20	4	1	0	1	7	MAL-sac	HET
	918-86R	nr	nr	nr	nr	nr	nr	nr	HET
5065	918-112L	38	3	2	0	0	11	sac	HET
	918-105LL	34	4	1	0	0	9	sac	HET
	918-59R	33	7	2	0	1	8	sac	HET
	918-103L	24	5	2	2	2	8	F/D	HET
	918-38LL	33	7	5	5	5	7	sac	WT
	918-82N	23	2	0	0	0	7	mal- sac	HET
	918-16R	31	7	6	5	5	6	sac	WT
	918-111N	37	3	nr	nr	nr	6	sac	WT
	918-93L	23	5	5	4	5	6	sac	WT
	918-36L	29	3	nr	nr	nr	5	F/D	WT
	918-6N	nr	nr	nr	nr		4	F/D	HET
	918-58L	28	6	nr	nr	nr	2	F/D	WT
5066	918-18L	30	3	4	2	2	11	sac	WT
	918-19R	37	5	3	2	3	9	sac	WT
	918-89R	24	6	6	6	6	6	sac	WT
	918-32N	35	6	3	4	3	9	sac	WT
	918-108R	32	9	4	2	4	8	sac	WT
	918-52L	37	9	6	5	5	6	sac	WT
	918-106N	30	3	nr	nr	nr	6	F/D	WT
	918-90LL	21	2	nr	nr	nr	5	F/D	WT
	918-87N	13	3	nr	nr	nr	5	mal-sac	WT
5063
	918-10L	30	6	5	5	5	10	sac	WT
	918-9N	25	7	6	5	5	7	sac	WT
	918-75LL	23	7	4	4	5	8	sac	WT
	918-55R	19	8	4	6	6	7	sac	WT
	918-53N	22	6	6	5	5	9	MAL-SAC	WT
	918-4LL	24	7	5	5	5	8	sac	WT
	918-3R	23	6	5	5	5	7	F/D	WT
	918-31LL	24	8	5	5	6	8	sac	WT
	918-29L	23	8	6	5	5	8	sac	WT
	918-28N	26	8	6	5	5	8	sac	WT
	918-73L	nr	nr	nr	nr	nr	nr	endpoint	WT
	918-68L	36	9	6	5	5	7	sac	WT
	918-72N						7	sac
5064
	918-23LL	33	4	5	4	4	8	sac	WT
	918-22R	18	6	4	5	6	7	sac	WT
	918-21L	19	1	NR	NR	NR	5	F/D	WT

## Sheet: J_57L
N2 ID	G3 Male ID	Weight (g)	HS@8wk	Limb clasp	Activity	Tone	Survival (Weeks)	Comments	CHR3: Col24a1	CHR9: Apoa5	CHR10: Hcn2	Partially Genotyped	N2 Family	Mecp2/Y	WT	Grand total	Improved
4339	J57-87N	38	6	2	1	1	13	F/D	HET	WT	HET	CHR9: Acpp	4339	17	17	34	6
	J57-113LL	28	1	0	0	0	13	sac	HET	HET	WT		4340	14	14	28	2
	J57-145LL	38	3	3	1	1	12	sac	WT	WT	HET		4342	9	8	17	1
	J57-191L	33	3	2	2	0	12	sac	WT	HET	WT		4343	13	7	20	0
	J57-163RR	41	4	2	1	0	10	sac	HET	HET	HET		4344	12	10	22	5
	J57-158RR	28	3	2	0	1	10	sac	HET	WT	HET		4345	7	7	14	1
	J57-161R	39	8	6	2	2	9	sac	WT	HET	HET		4346	13	11	24	0
	J57-84L	34	5	3	4	3	9	F/D	HET	WT	HET		4347	7	5	12	1
	J57-186RR	34	5	2	3	2	8.4	F/D	WT	HET	WT		4348	16	9	25	2
	J57-89R	29	7	4	3	2	8	F/D	WT	HET	WT		7/9	108	88	196	18
	J57-36RR	29	9	5	5	5	8	sac	HET	WT	WT
	J57-35LL	37	8	4	3	3	7	sac	WT	HET	WT
	J57-111L	12	5	nr	nr	nr	5	F/D	HET	HET	HET
	J57-110N						5	sac
	J57-182N						<5	sac
	J57-183L						<5	sac
	J57-190N						<5	sac
4340	J57-80N	33	4	2	0	1	10	sac	WT	HET	HET
	J57-81L	34	5	0	1	2	10	sac	WT	HET	WT
	J57-115L	35	6	6	2	3	9	sac	WT	WT	WT
	J57-169L	36	6	5	2	2	9	sac	WT	WT	HET
	J57-170R	37	7	5	1	2	9	sac	WT	WT	HET
	J57-21R	34	7	5	3	3	8	sac	WT	HET	WT
	J57-57R	23	4	3	2	3	8	F/D	WT	HET	WT
	J57-168N	29	4	3	3	3	8	sac	WT	HET	WT
	J57-130R	34	10	4	4	4	7	sac	WT	HET	WT
	J57-128N	33	3	nr	nr	nr	6	sac	WT	HET	HET
	J57-60R	12	5	nr	nr	nr	5	sac	WT	WT	HET
	J57-20L	33	5	nr	nr	nr	6	F/D	WT	HET	WT
	J57-167LL	21	2	nr	nr	nr	5	F/D	WT	WT	WT
	J57-82R						<5	sac
4342	J57-179R	49	7	3	0	1	14	sac	WT	HET	HET
	J57-151N	36	9	5	2	1	9	sac	WT	HET	HET
	J57-178L	31	4	3	2	2	8	sac	WT	HET	WT
	J57-37N	30	8	5	2	2	8	sac	WT	WT	HET
	J57-104N	20	7	nr	nr	nr	6	F/D	WT	HET	WT
	J57-177N	15	2	nr	nr	nr	6	sac	WT	HET	WT
	J57-25R	32	8	nr	nr	nr	6	sac	WT	WT	WT
	J57-152L	14	2	nr	nr	nr	5	mal- sac	WT	WT	WT
	J57-127L						5	sac
4343	J57-148L	30	9	4	3	3	8	sac	WT	WT	WT
	J57-61N	38	10	5	3	3	8	sac	WT	WT	WT
	J57-64LL	20	7	5	6	6	7	sac	WT	WT	WT
	J57-28N	24	7	nr	nr	nr	6	sac	WT	WT	WT
	J57-29L	27	7	nr	nr	nr	6	sac	WT	WT	WT
	J57-30R	26	6	nr	nr	nr	6	sac	WT	WT	WT
	J57-123N	22	4	nr	nr	nr	6	sac	WT	WT	WT
	J57-124L	29	4	nr	nr	nr	6	sac	WT	WT	WT
	J57-150LL	25	3	nr	nr	nr	6	sac	WT	WT	WT
	J57-63R	11	8	nr	nr	nr	5	sac	WT	WT	WT
	J57-31LL						<5	sac
	J57-99R						5	sac
	J57-125R						<5	sac
4344	J57-188L	42	3	3	0	0	13	sac	WT	HET	HET
	J57-194N	37	1	1	0	0	13	sac	WT	HET	HET
	J57-102N	40	6	5	0	0	10	sac	WT	HET	WT
	J57-135RR	34	6	3	0	0	10	sac	WT	WT	HET
	J57-172L	37	7	4	1	1	10	sac	WT	HET	HET
	J57-11RR	29	3	0	1	1	8	sac	WT	HET	WT
	J57-171N	32	8	4	3	3	8	sac	HET	HET	WT
	J57-7N	34	9	0	2	2	7	sac	HET	HET	HET
	J57-187N	23	9	3	3	3	7	sac	WT	HET	WT
	J57-9R	15	2	nr	nr	nr	7	F/D	HET	WT	HET
	J57-45L	18	6	nr	nr	nr	6	sac	HET	HET	HET
	J57-196LL	nr	nr	nr	nr	nr	4		WT	WT	WT
4345	J57-96N	31	7	2	1	2	12	sac	WT	WT	WT
	J57-176R	22	6	3	3	3	10	sac-mal	WT	WT	WT
	J57-189N	33	4	3	2	3	10	sac-mal	WT	WT	WT
	J57-175L	45	8	6	3	4	9	sac	WT	WT	WT
	J57-27N	31	7	nr	nr	nr	6	SAC	WT	WT	WT
	J57-47N	31	7	nr	nr	nr	7	sac	WT	WT	WT
	J57-201N	25	5	5	5	5	7	sac	WT	WT	WT
4346	J57-12N	31	5	3	3	1	12	mal-sac	WT	WT	WT
	J57-141R	34	7	3	2	2	9	sac	WT	HET	WT
	J57-39N	38	11	4	4	4	8	sac	WT	HET	HET
	J57-136N	22	2	nr	nr	nr	7	sac	WT	WT	WT
	J57-138R	27	2	nr	nr	nr	7	sac	WT	WT	WT
	J57-70R	33	9	nr	nr	nr	8	sac	WT	HET	WT
	J57-71LL	34	10	nr	nr	nr	8	sac	WT	HET	WT
	J57-14R	19	2	1	1	1	7	sac	WT	WT	HET
	J57-15LL	34	8	5	4	5	7	sac	WT	WT	WT
	J57-41R	29	6	nr	nr	nr	7	F/D	WT	WT	HET
	J57-68N	12	8	nr	nr	nr	5	sac, tiny	WT	WT	WT
	J57-43RR	F/D < 5 weeks
	J57-140L	F/D < 5 weeks
4347	J57-76LL	35	6	2	1	1	10	sac	WT	HET	WT
	J57-1N	38	6	0	2	1	9	sac	WT	HET	WT
	J57-3R	35	7	1	4	1	9	sac	WT	HET	WT
	J57-5L	31	3	2	2	2	8	F/D	WT	HET	WT
	J57-73N	30	4	3	4	4	9	sac	WT	WT	WT
	J57-74L	38	9	4	5	3	9	sac	WT	WT	WT
	J57-33L	26	nr	nr	nr	nr	6	F/D	WT	HET	WT
4348	J57-92R	27	4	1	1	0	14	sac	HET	HET	WT
	J57-90N	30	5	1	1	1	11	sac	WT	HET	WT
	J57-121LL	24	4	3	1	3	9	sac	WT	HET	WT
	J57-198L	44	7	3	2	4	9	sac	HET	WT	WT
	J57-17N	28	4	5	4	4	8	F/D	WT	WT	WT
	J57-181L	16	8	3	2	2	8	mal, sac	HET	HET	WT
	J57-120R	24	4	2	2	2	8	F/D	WT	HET	WT
	J57-200LL	39	10	3	3	3	8	sac	WT	HET	WT
	J57-154N	34	8	4	2	3	7	sac	HET	HET	WT
	J57-93N	22	9	1	2	2	7	sac	HET	HET	WT
	J57-155L	36	9	5	5	5	7	sac	HET	WT	WT
	J57-157LL	36	11	5	6	6	7	sac	WT	WT	WT
	J57-122RR	14	3	nr	nr	nr	6	F/D	HET	HET	WT
	J57-118N	13	5	nr	nr	nr	6	F/D	HET	WT	WT
	J57-180N	15	8	nr	nr	nr	6	sac	HET	HET	WT
	J57-197N	28	1	nr	nr	nr	6	F/D	HET	HET	WT

[truncated: 14 more sheets: A_27R, A_333N, M_199LL, M_333R, 1395, 1527, 136, 137, 591, 722, 933_15N, A_87N, A_120N, A_134L]
